# Supplementary material for: Expedient synthesis of nitrovinyl substituted bicyclo[2.2.2]octenone scaffolds
Source: Royal Society of Chemistry journal article supplement (doi:10.1039/c5ra20016d), 2015-01-01
Supplement: c5ra20016d1.pdf [file c5ra20016d1.pdf]

## Expedient Synthesis of Nitrovinyl Substituted Bicyclo[2.2.2]octenone Scaffolds

Shivangi Sharma, Ram Tilak Naganaboina and Rama Krishna Peddinti\*

*Department of Chemistry, Indian Institute of Technology, Roorkee-247 667  
Uttarakhand, India*

E-mail: [rkpedfcy@iitr.ac.in](mailto:rkpedfcy@iitr.ac.in), [ramakpeddinti@gmail.com](mailto:ramakpeddinti@gmail.com)

---

### ELECTRONIC SUPPLEMENTARY INFORMATION

---

|                                                                                                                                     |        |
|-------------------------------------------------------------------------------------------------------------------------------------|--------|
| Copies of $^1\text{H}$ & $^{13}\text{C}$ NMR spectra                                                                                | S2–S28 |
| $^1\text{H}$ – $^1\text{H}$ Cosy Spectrum of cycloadduct <b>8a</b>                                                                  | S29    |
| HMQC Spectrum of cycloadduct <b>8a</b>                                                                                              | S30    |
| Table SI-1: Proton–proton and proton–carbon connectivity in <b>8a</b>                                                               | S31    |
| Table SI-2: Selected $^1\text{H}$ NMR chemical shifts ( $\delta$ in ppm) of Diels–Alder adducts<br><b>4a–4j</b> and <b>8a–8k</b>    | S32    |
| Table SI-3: Selected $^{13}\text{C}$ NMR chemical shifts ( $\delta$ in ppm) of Diels–Alder adducts<br><b>4a–4j</b> and <b>8a–8k</b> | S33    |



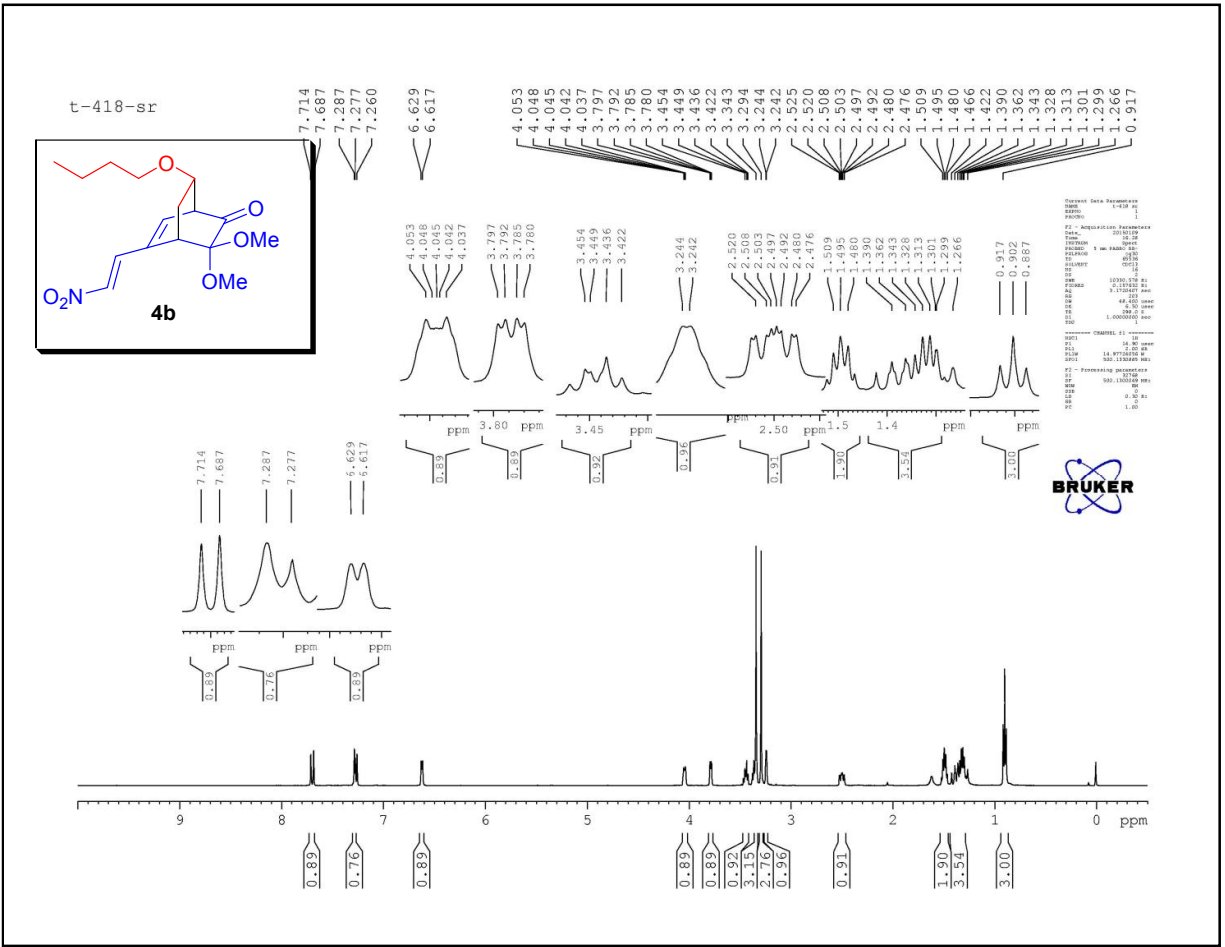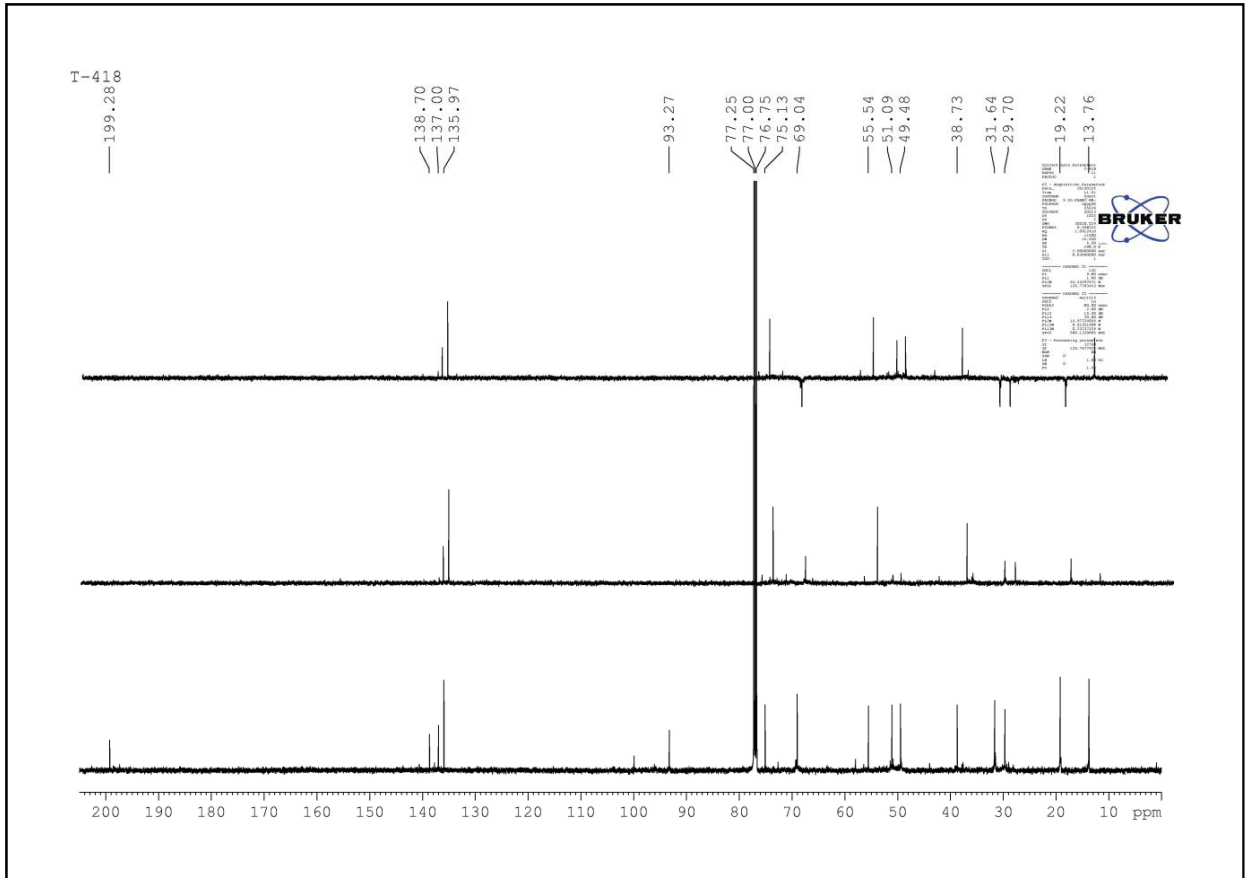

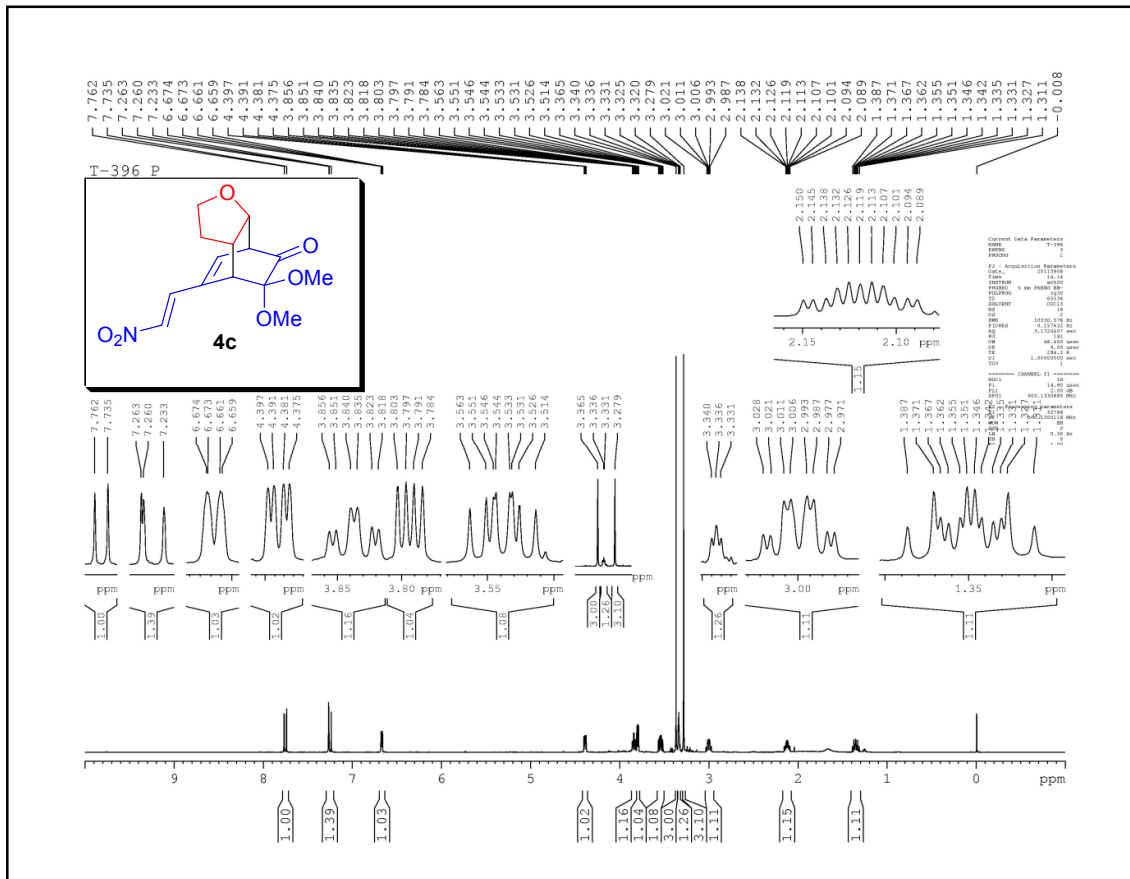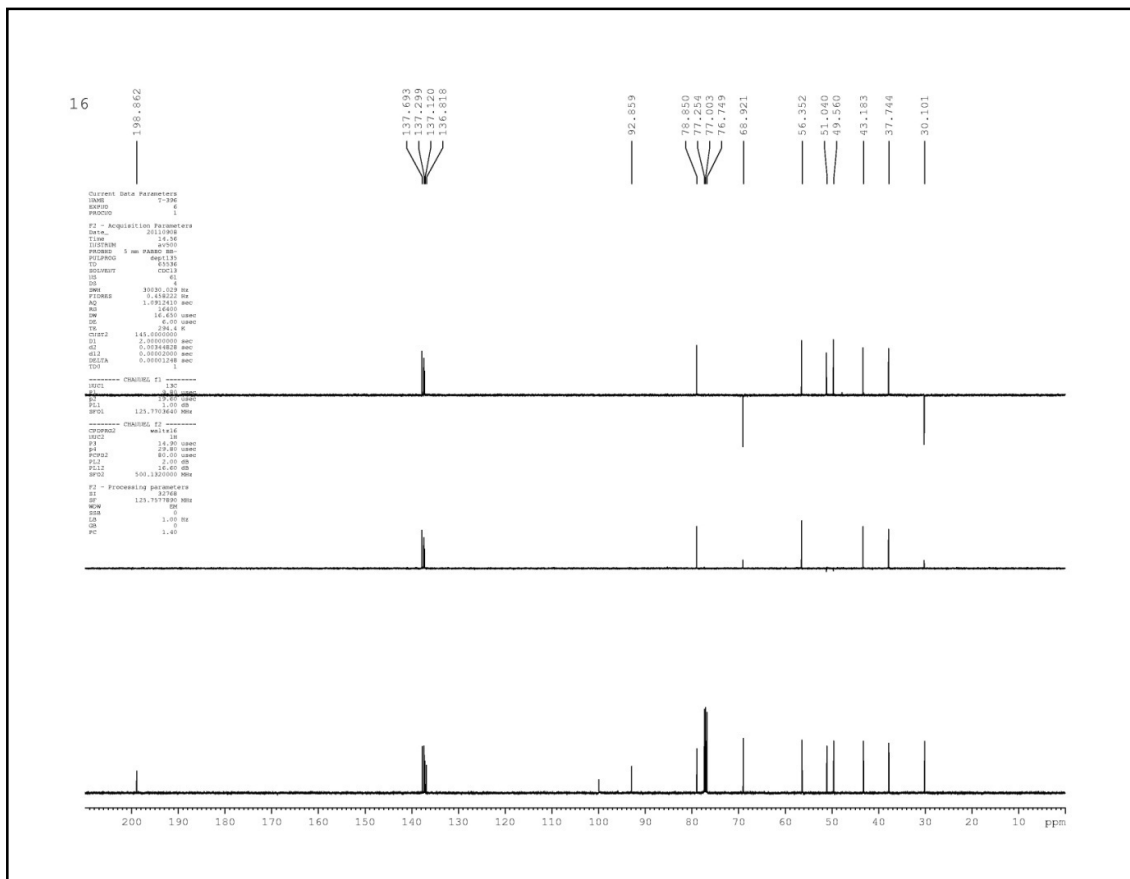





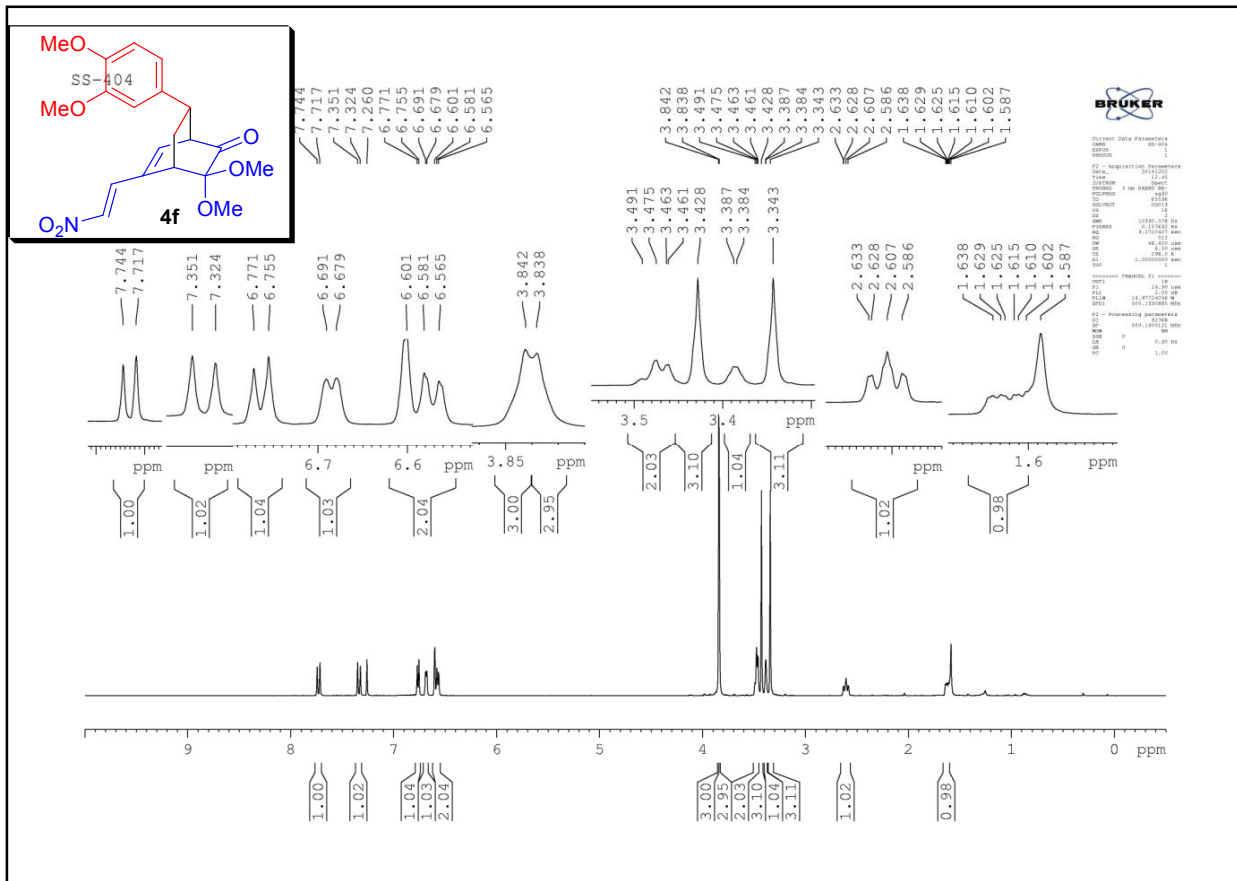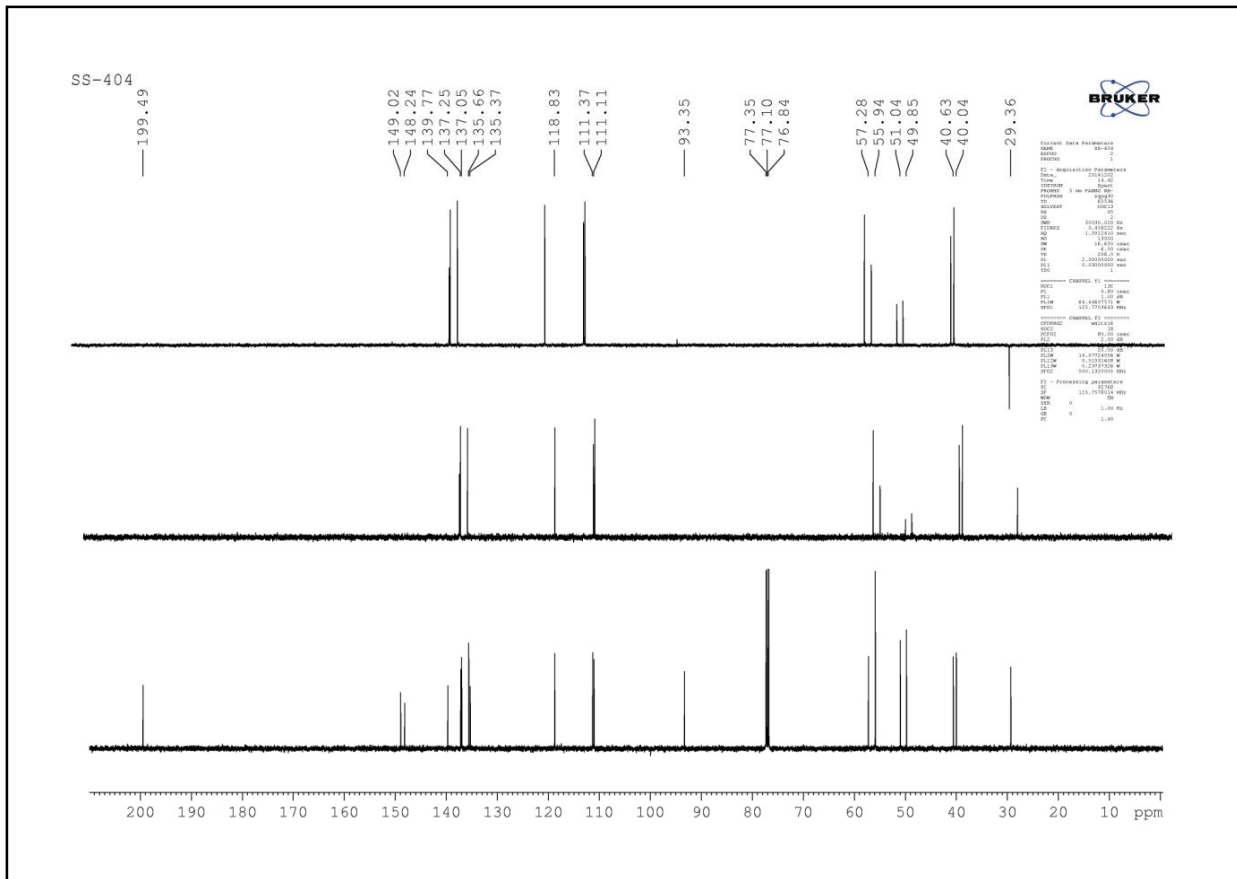

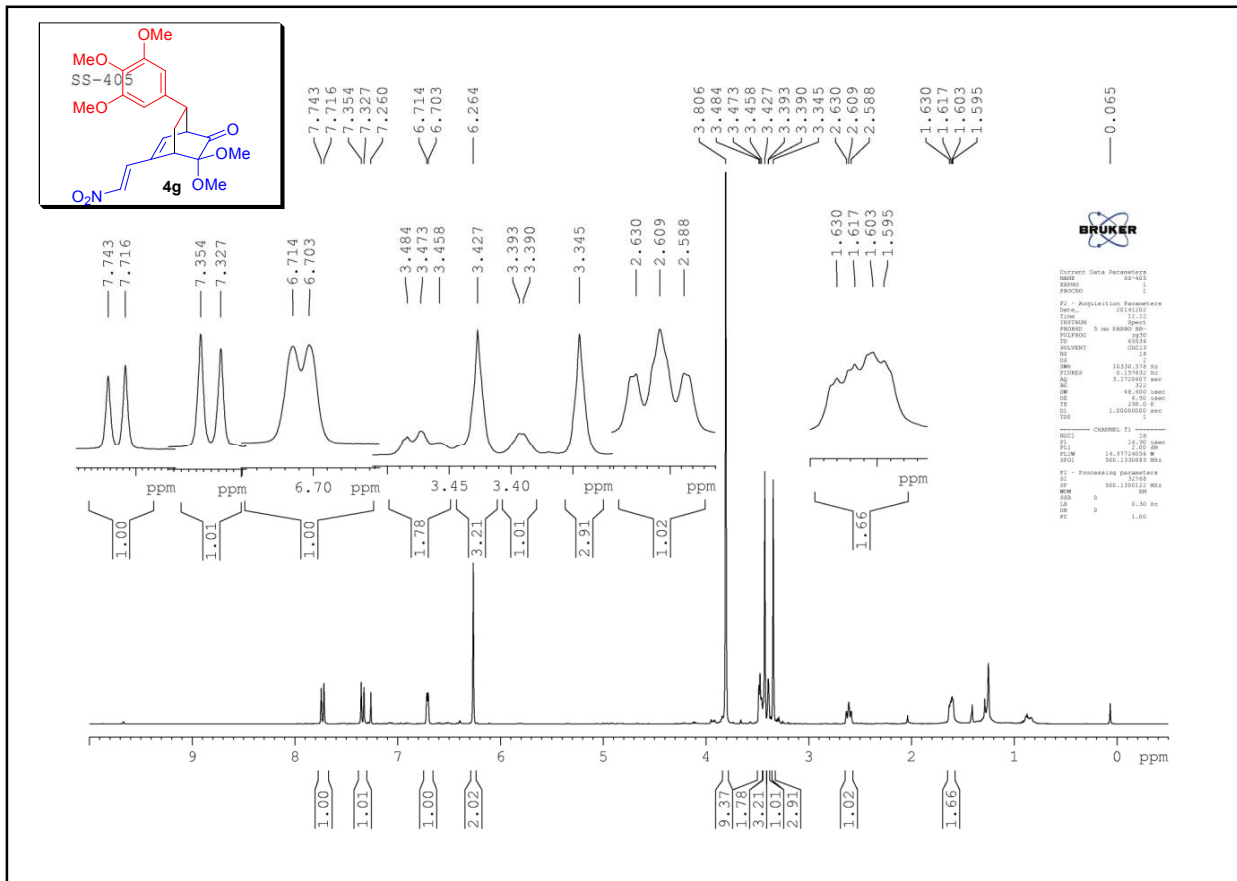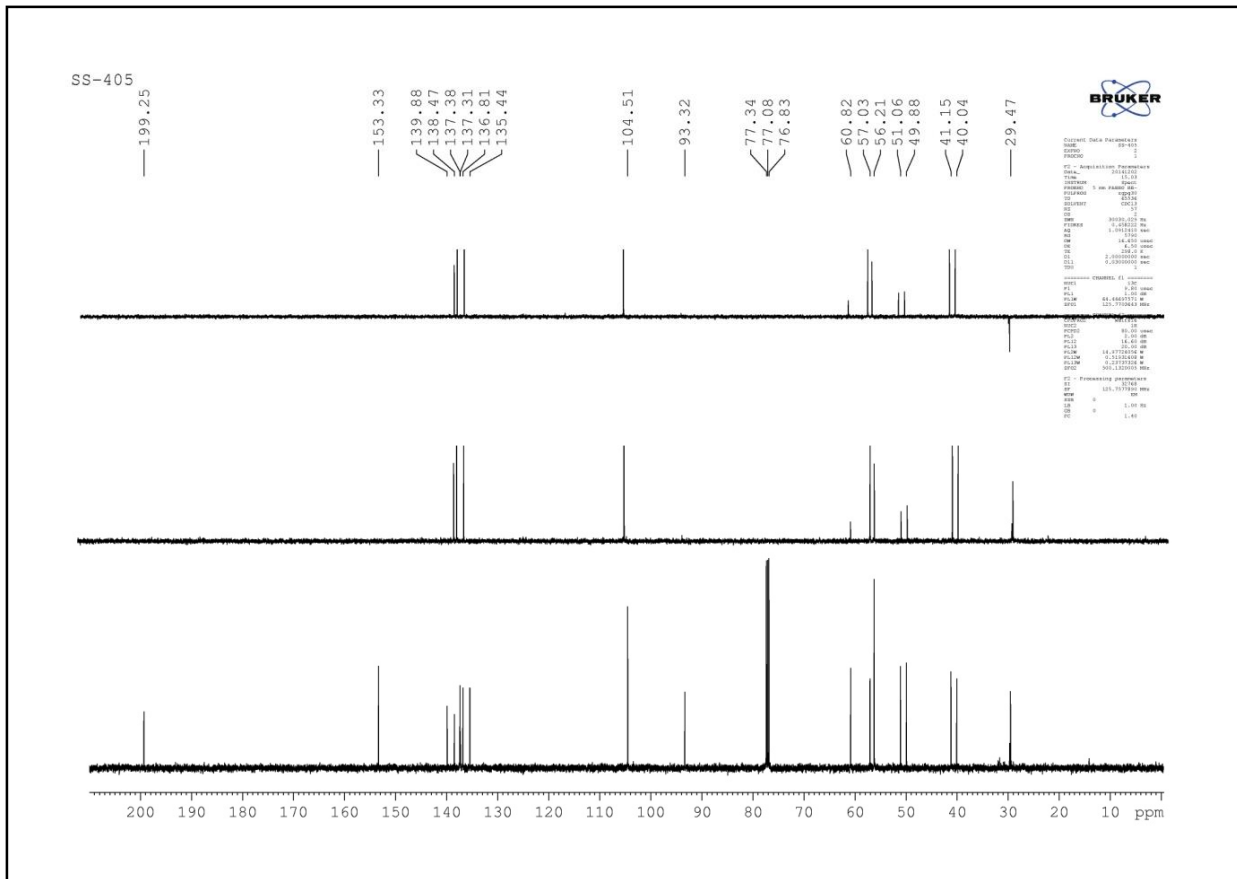



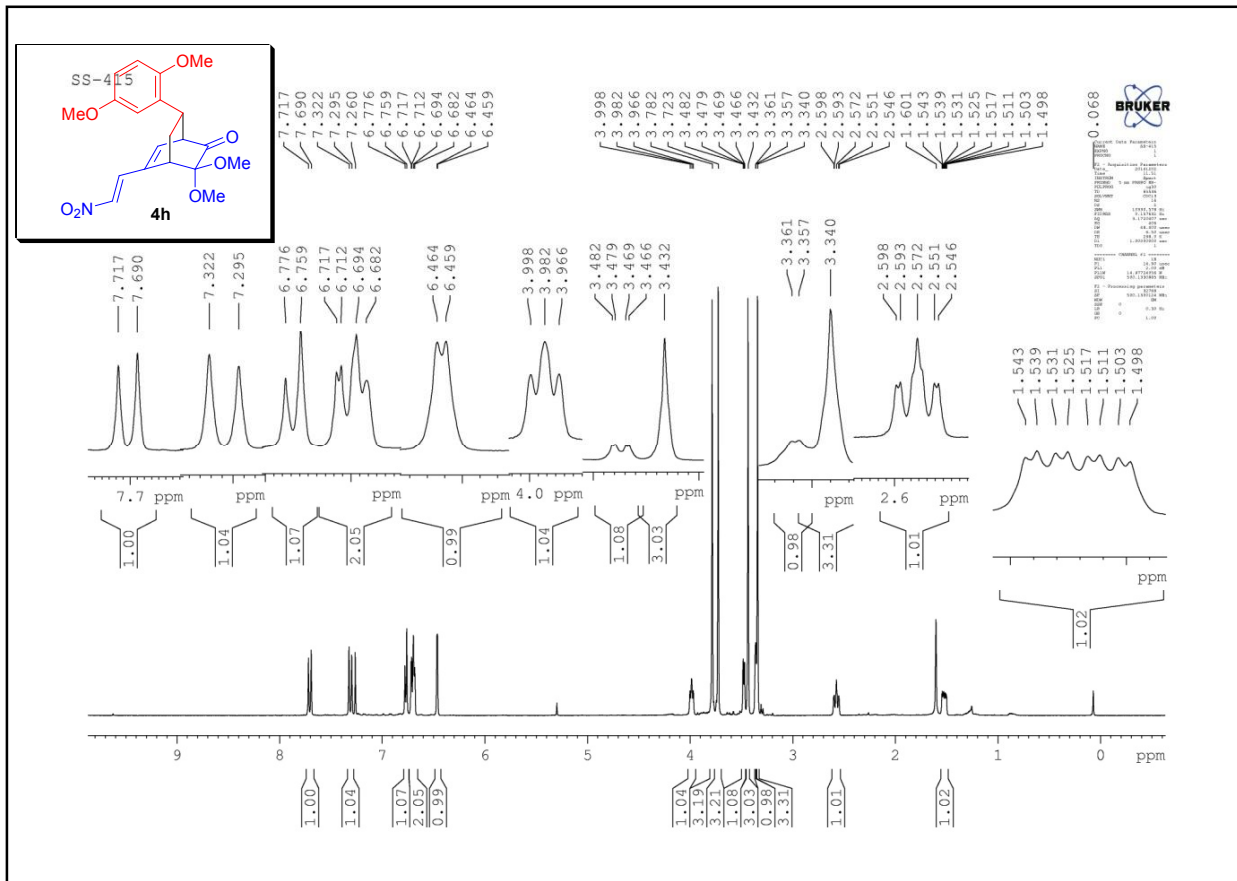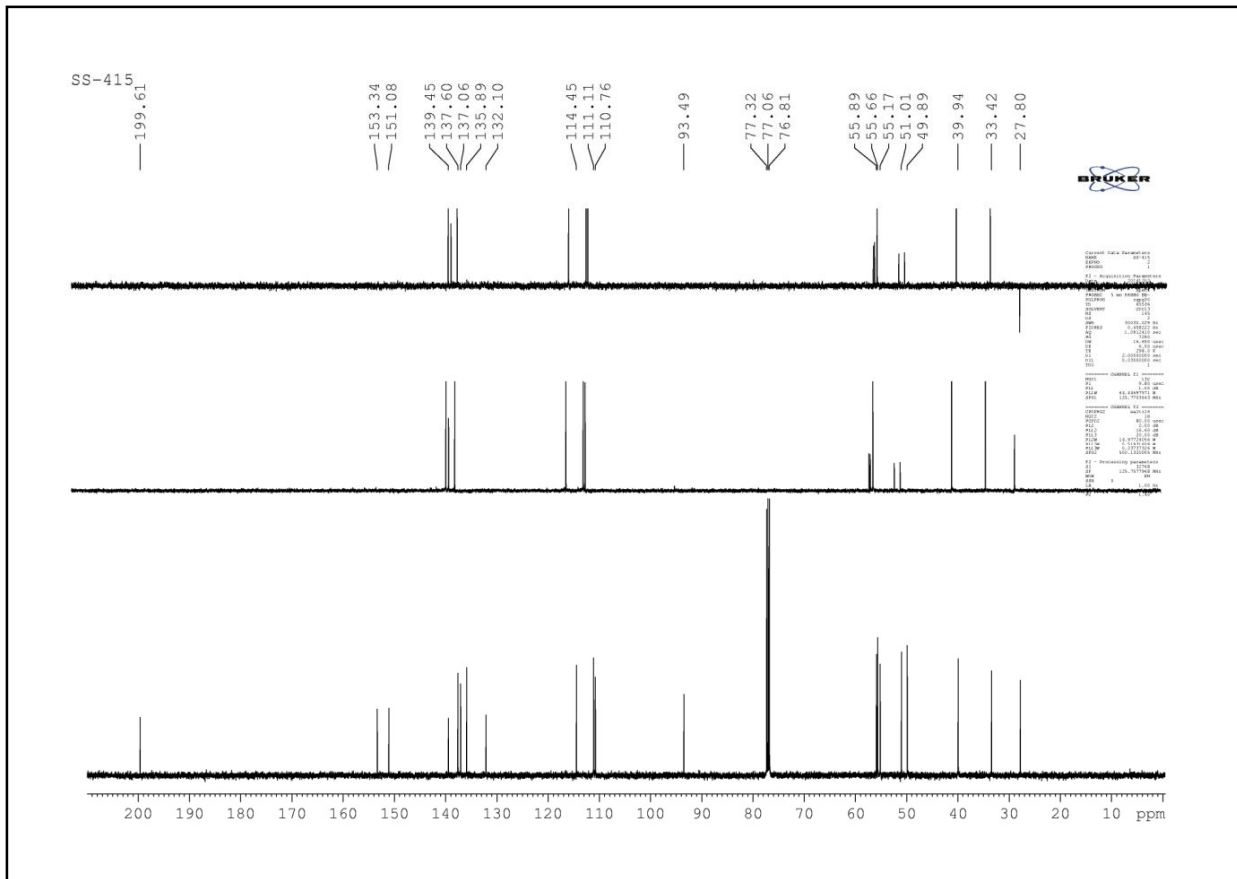



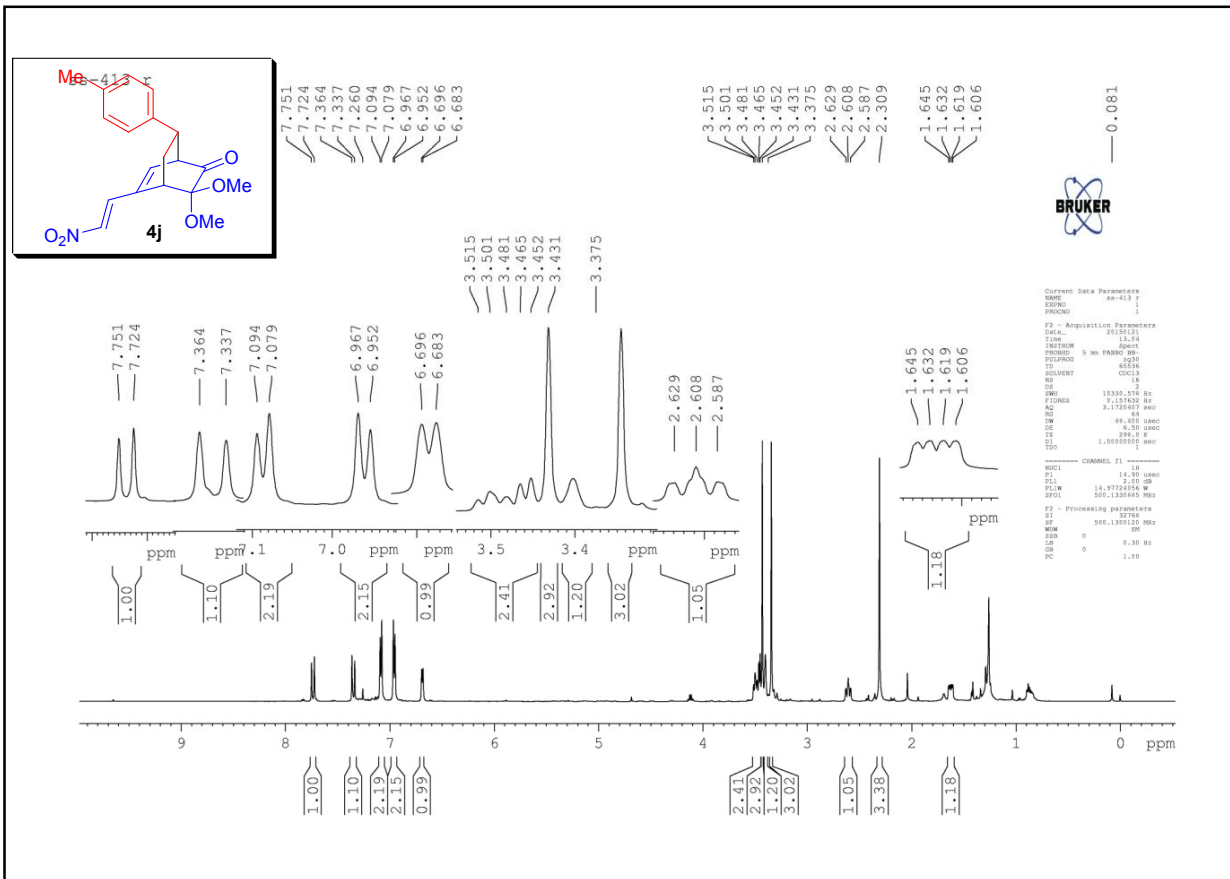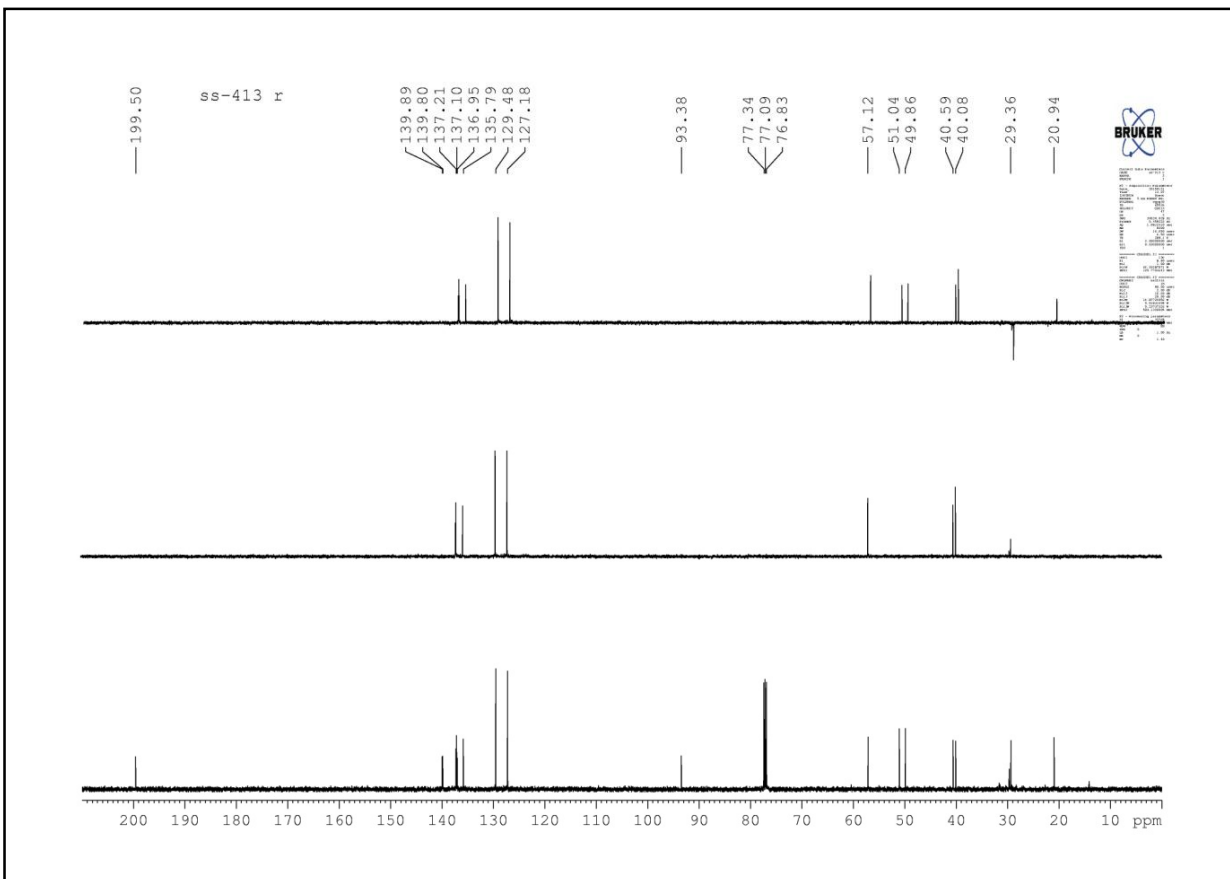







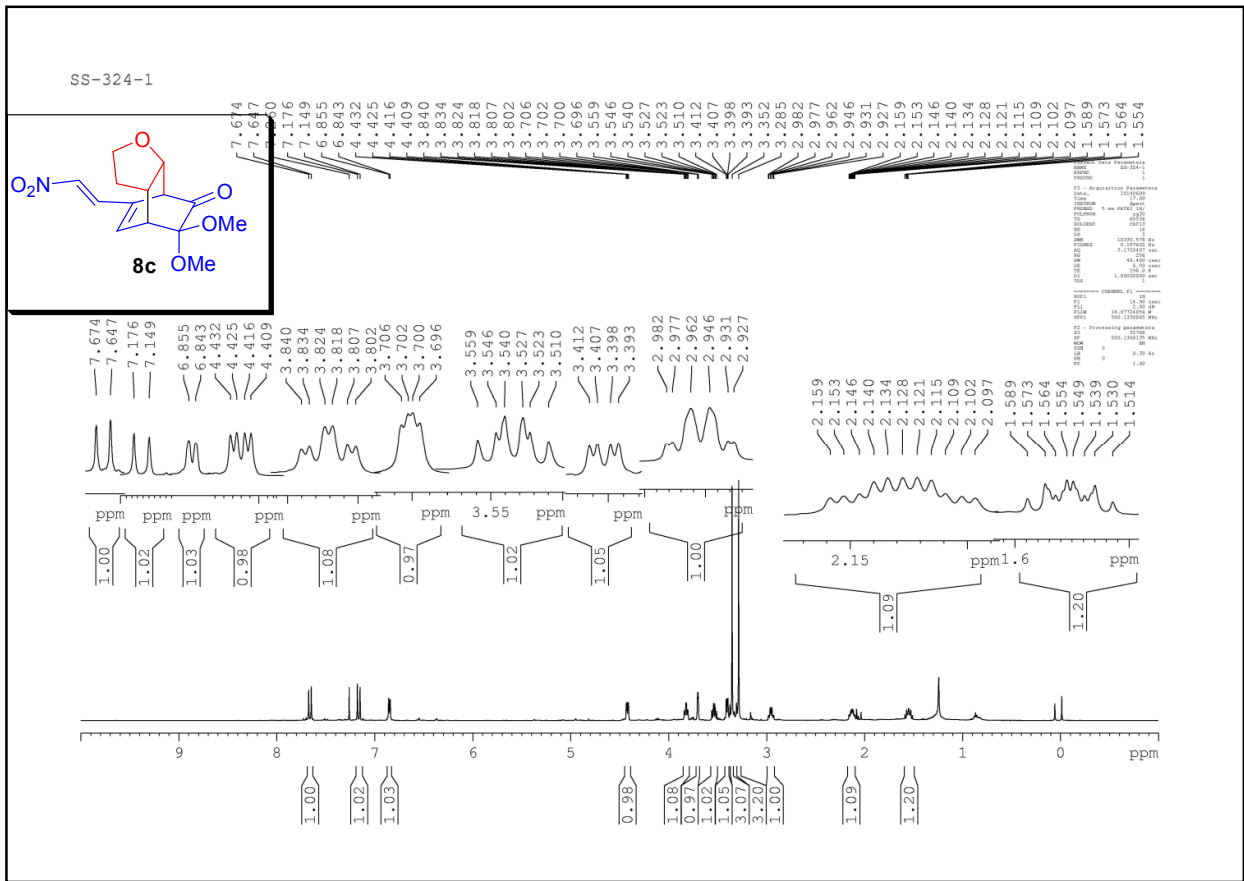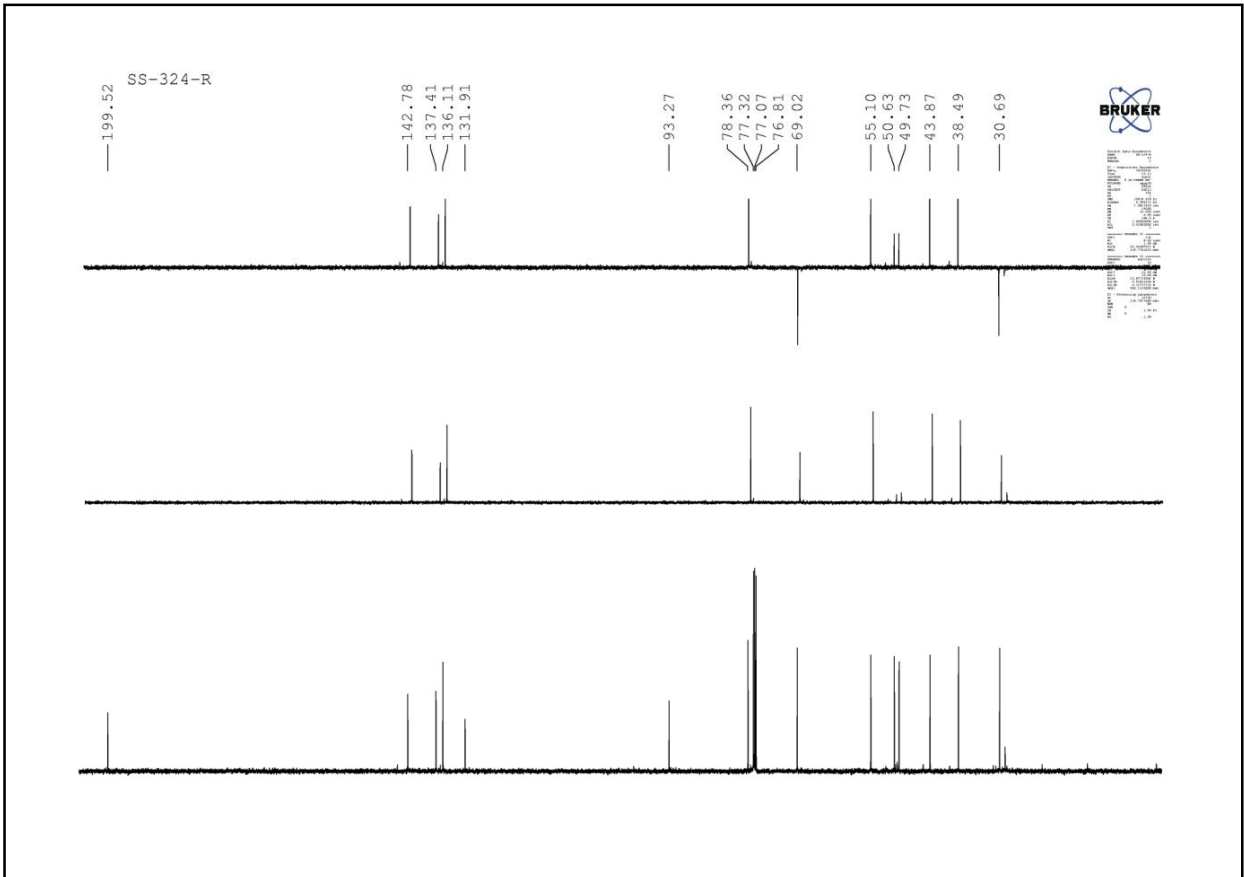

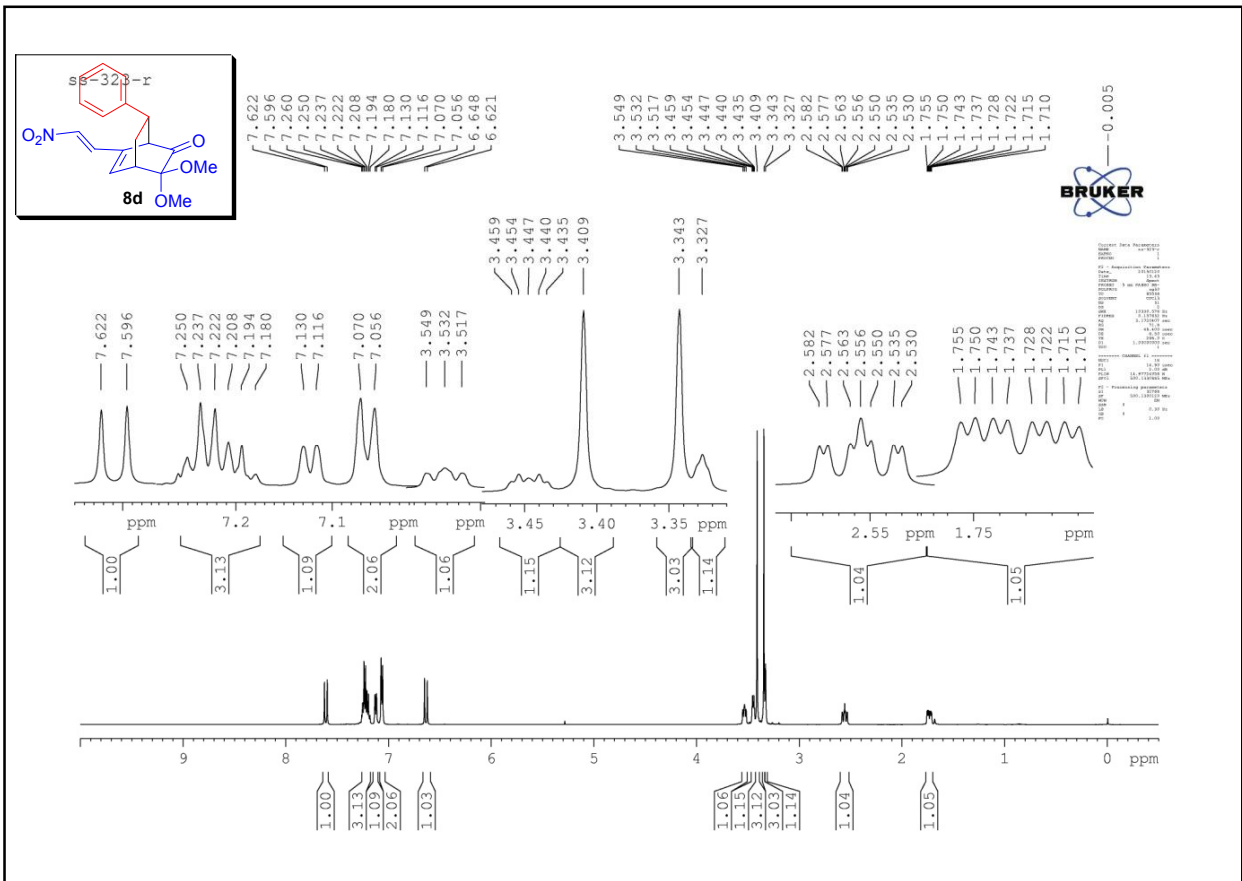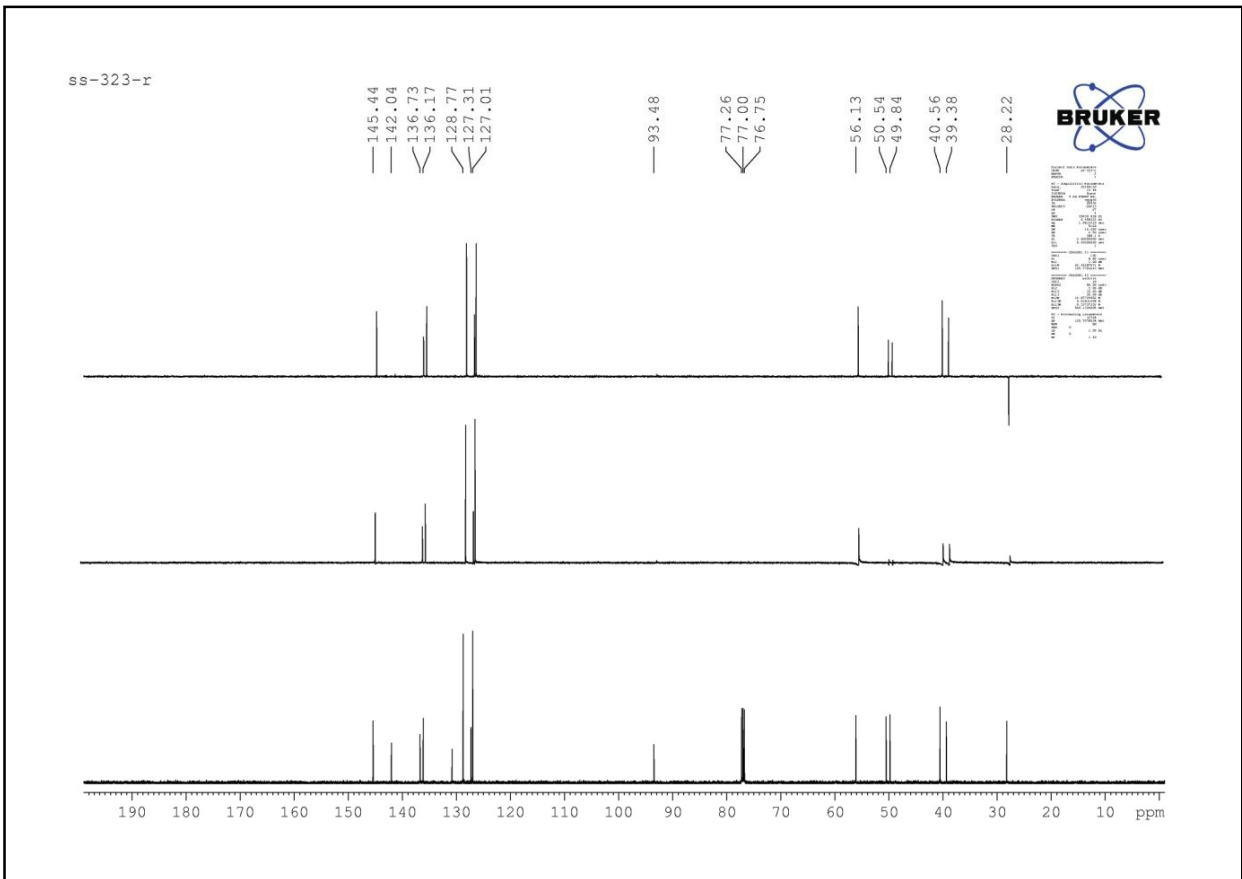



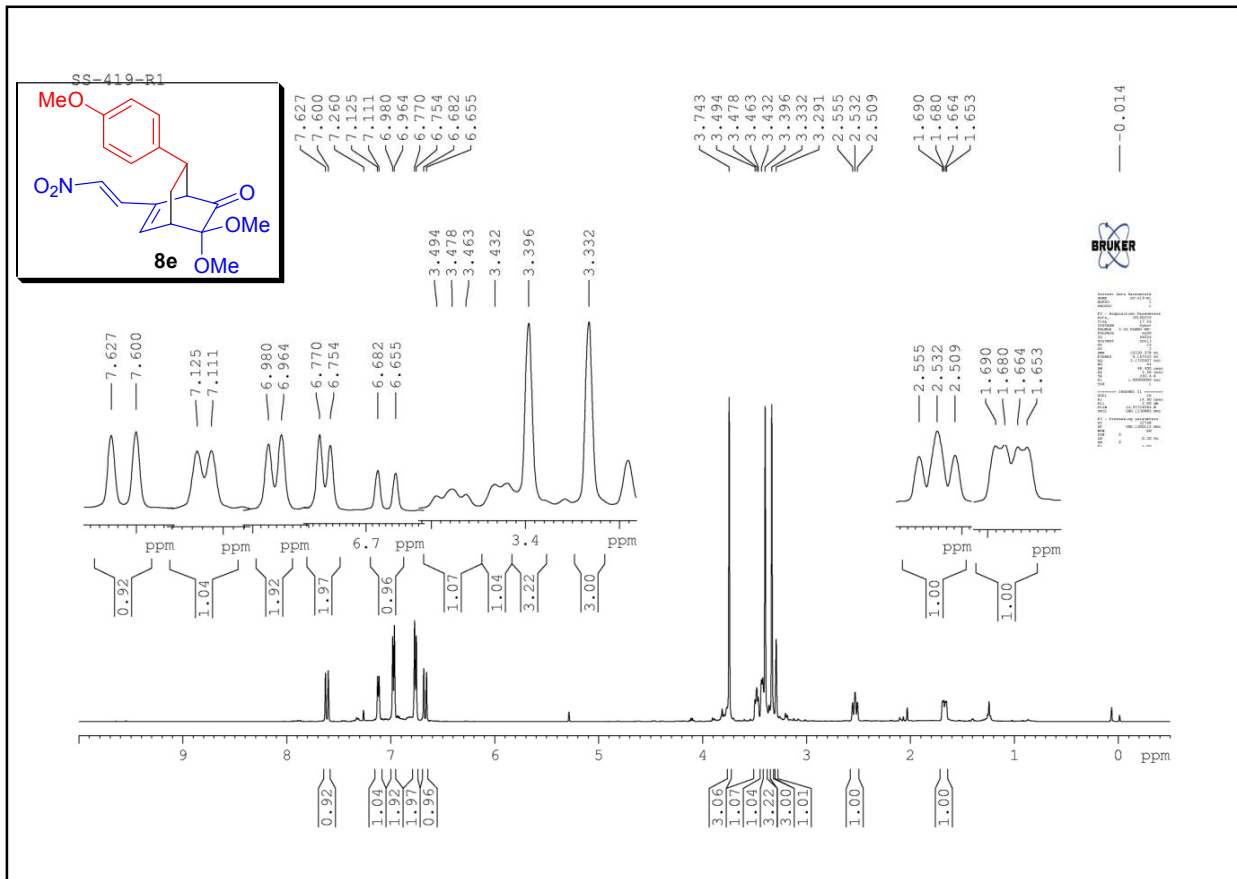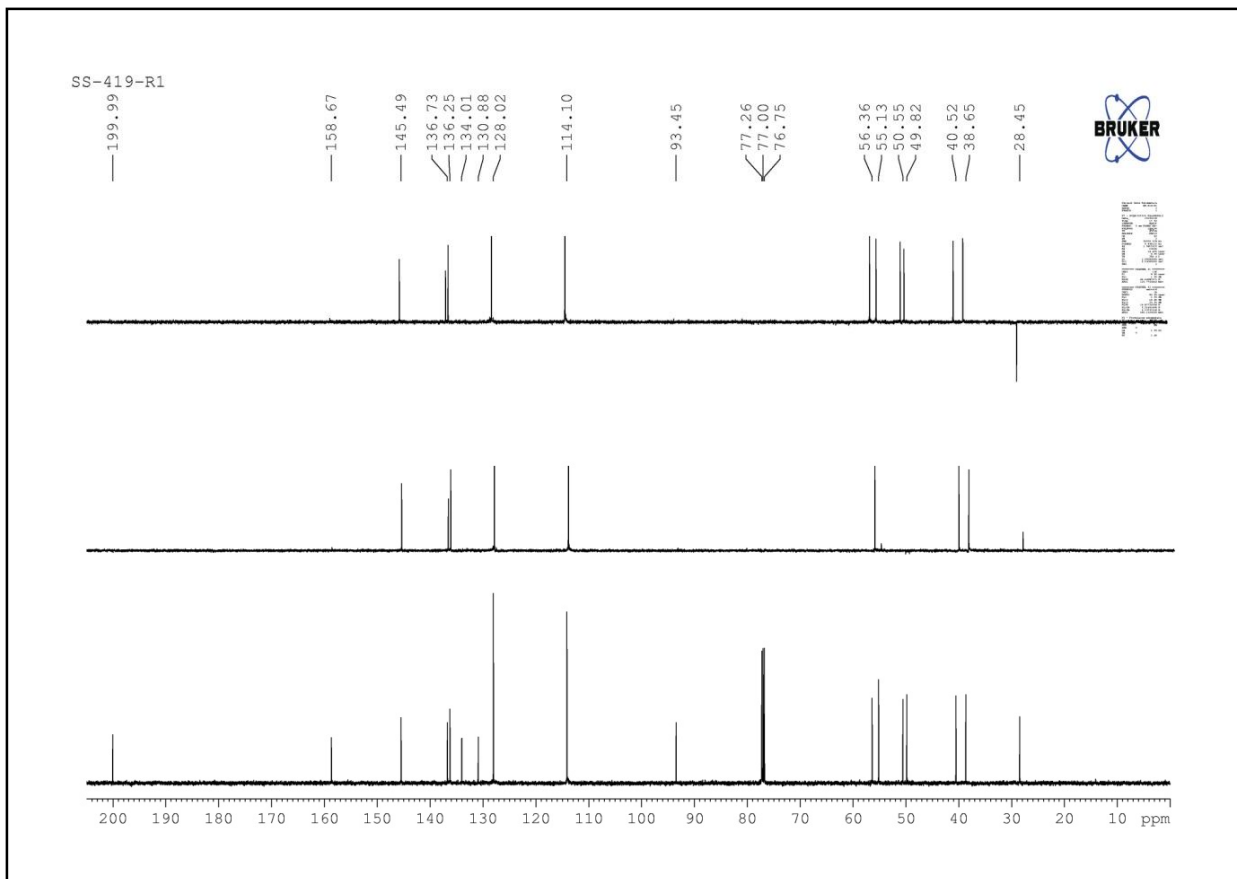

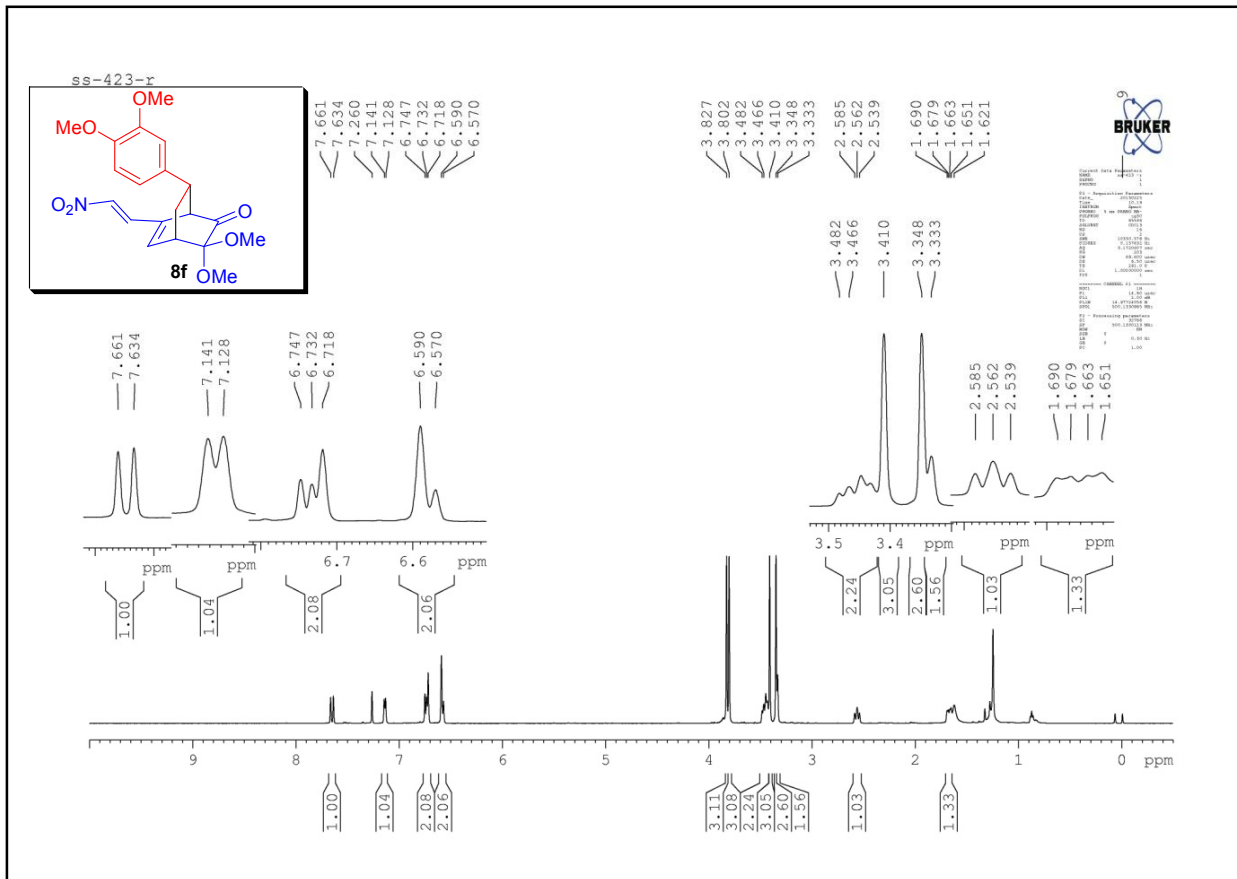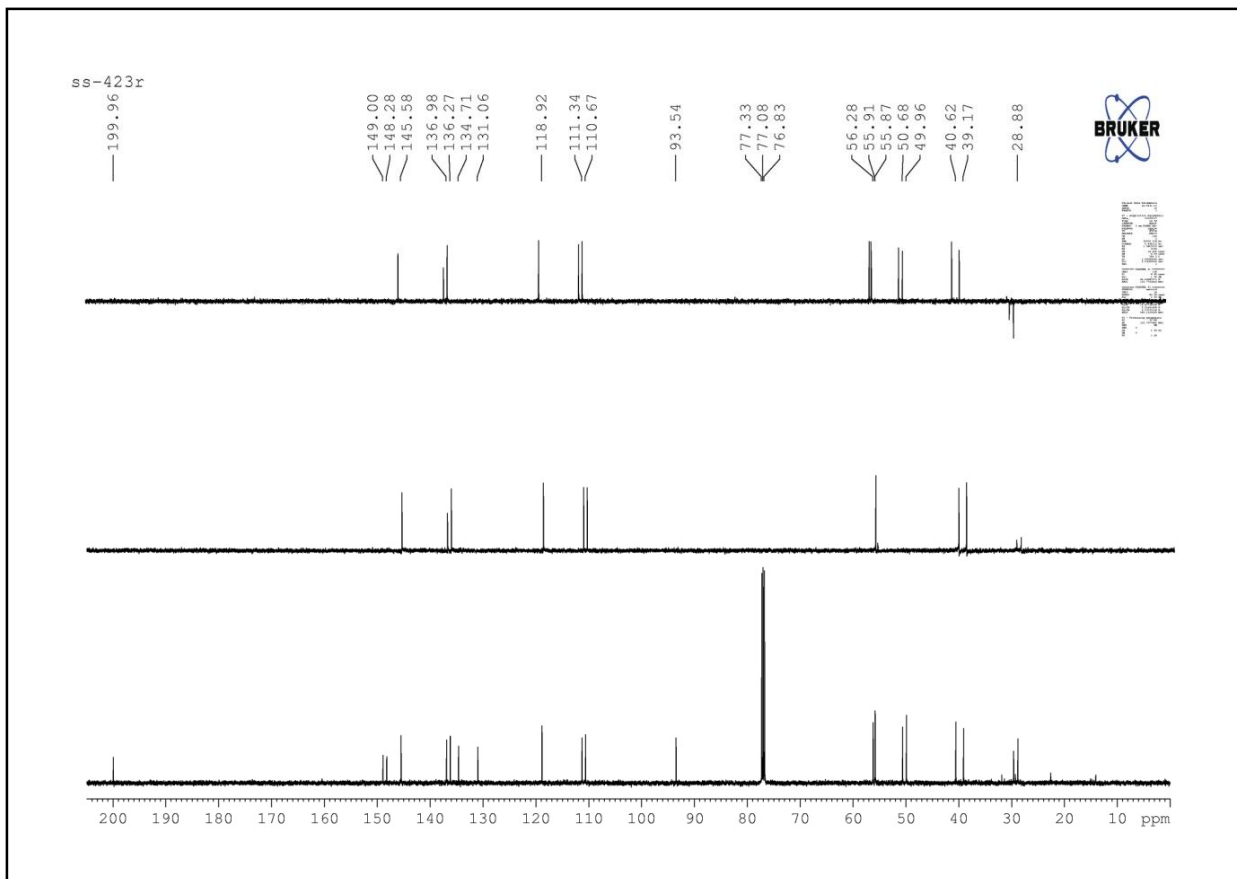

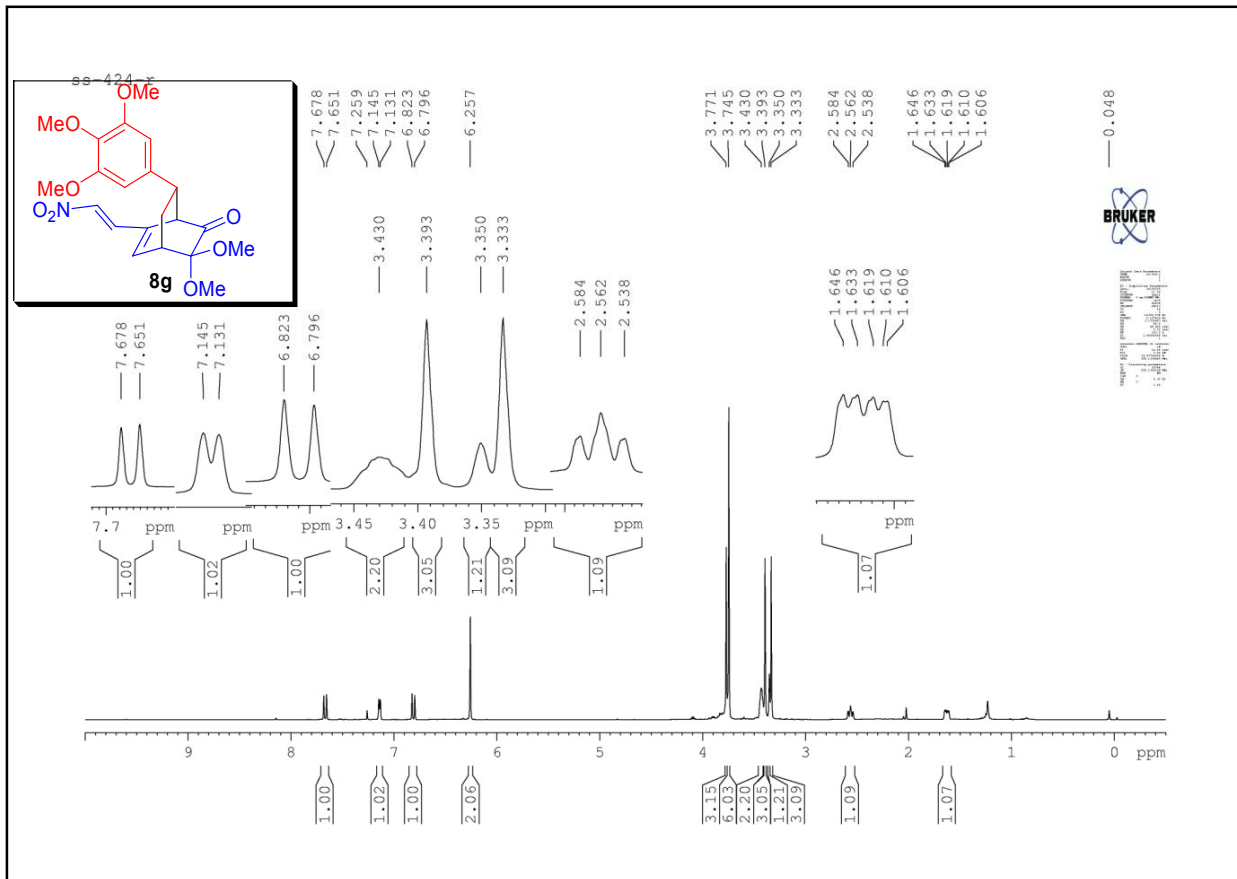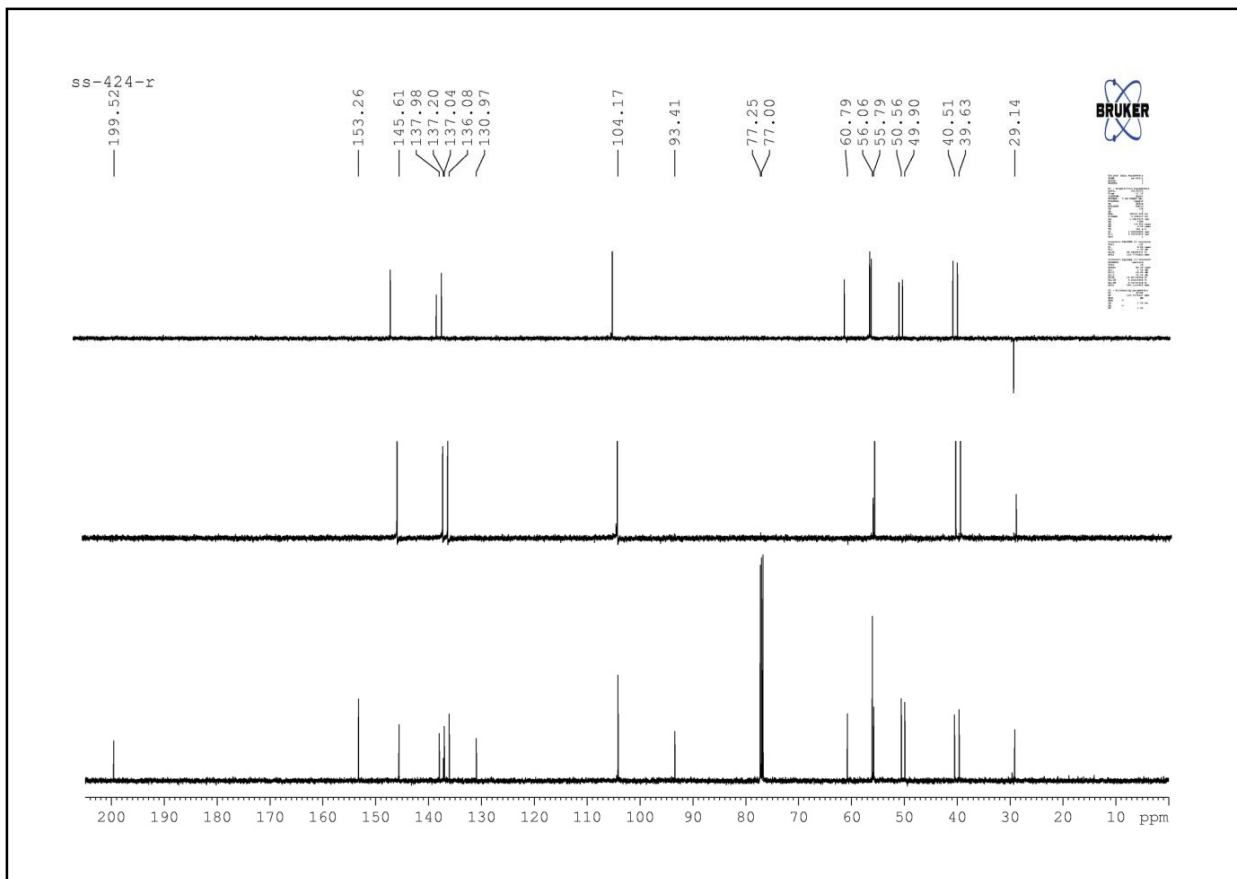

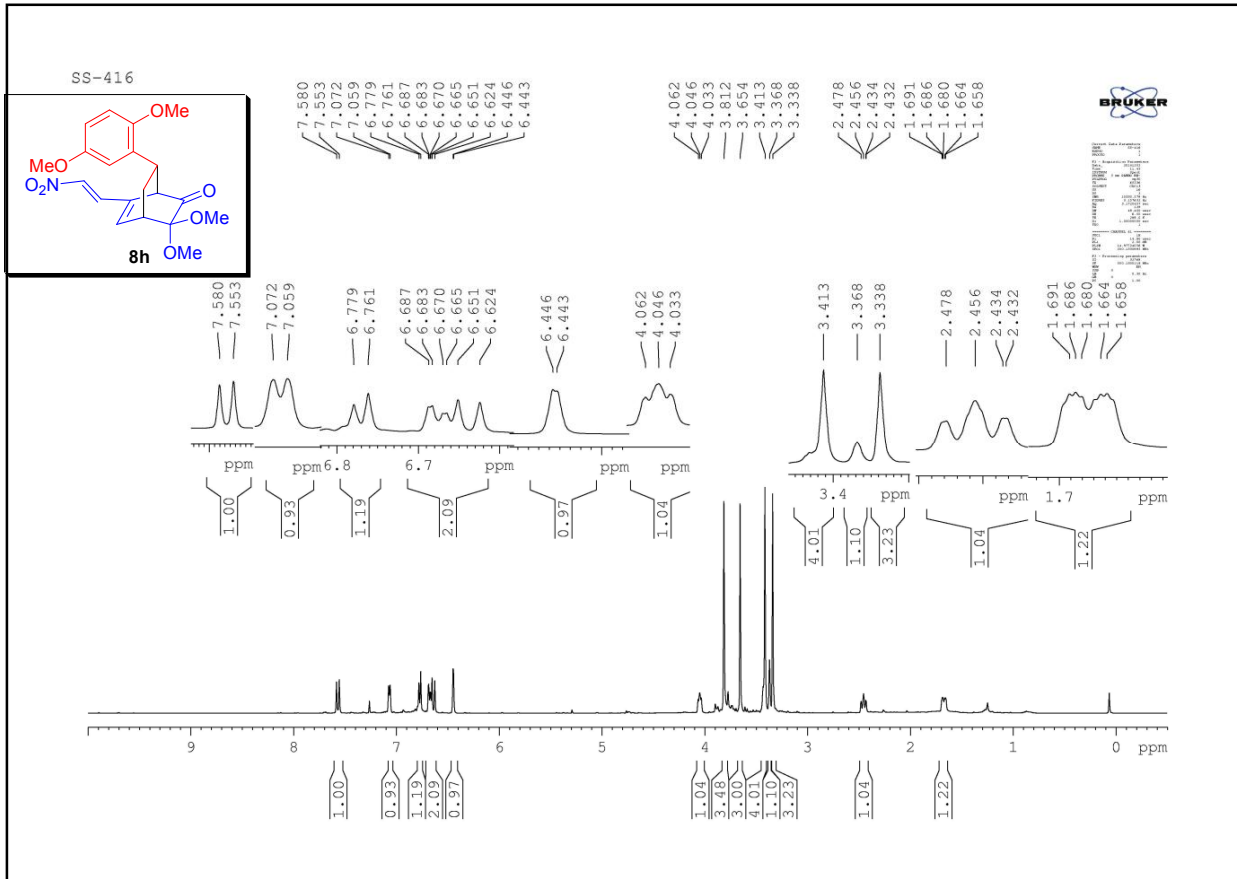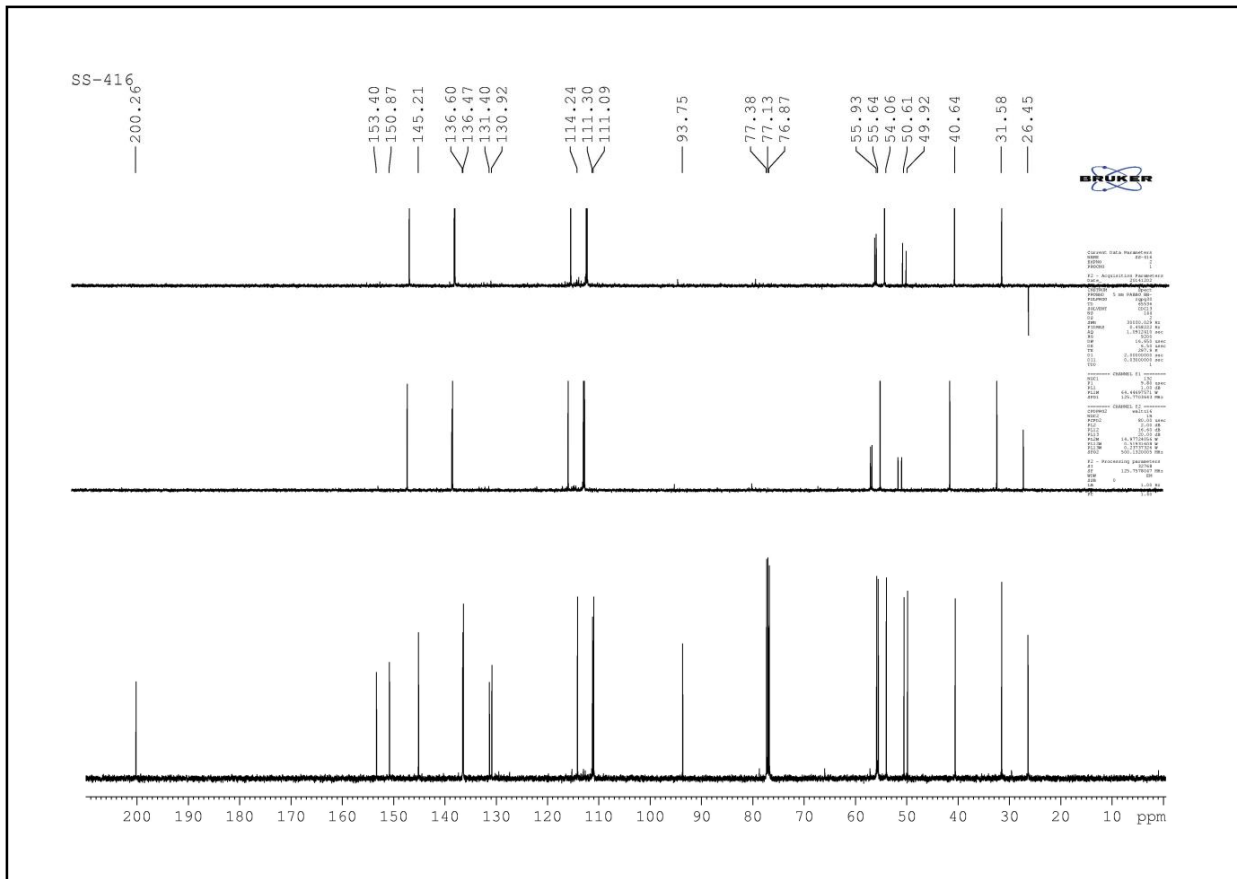

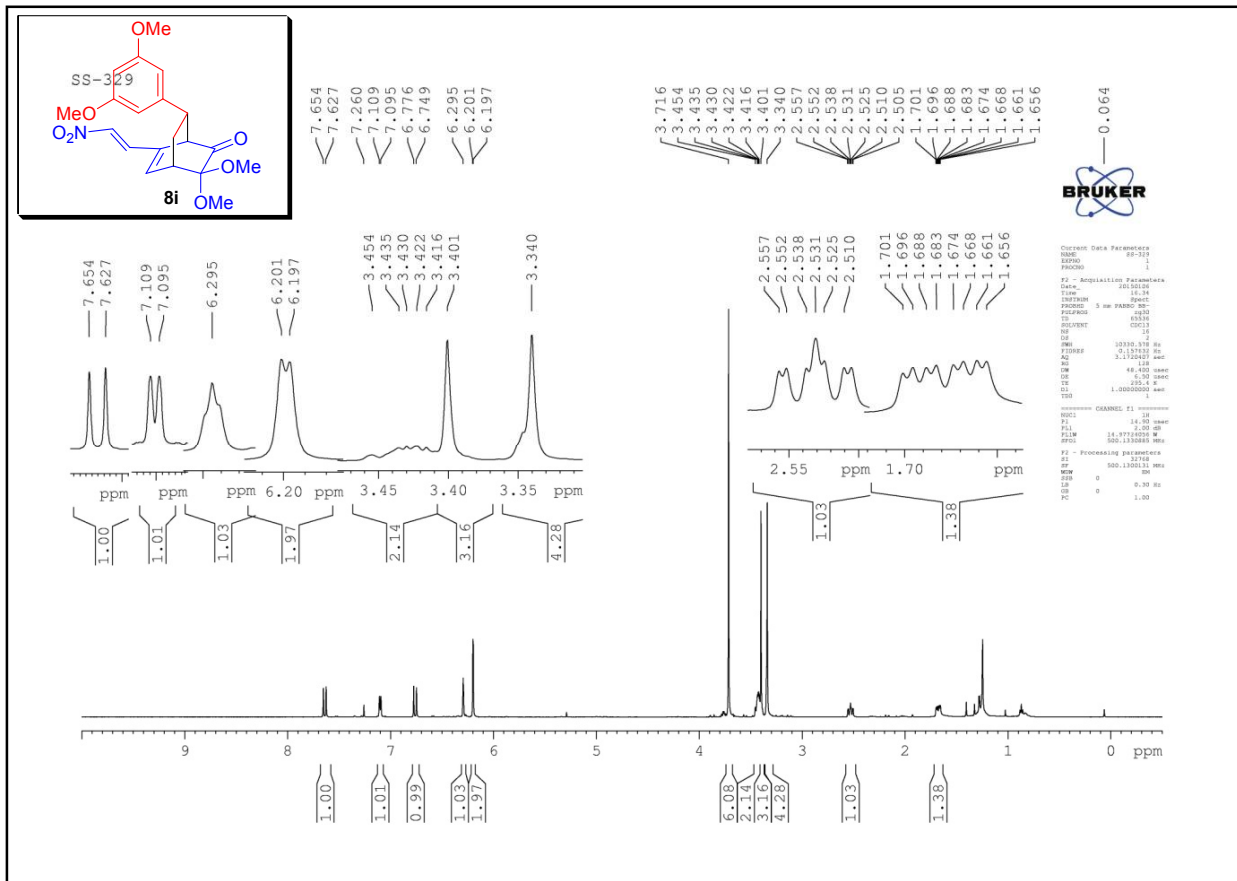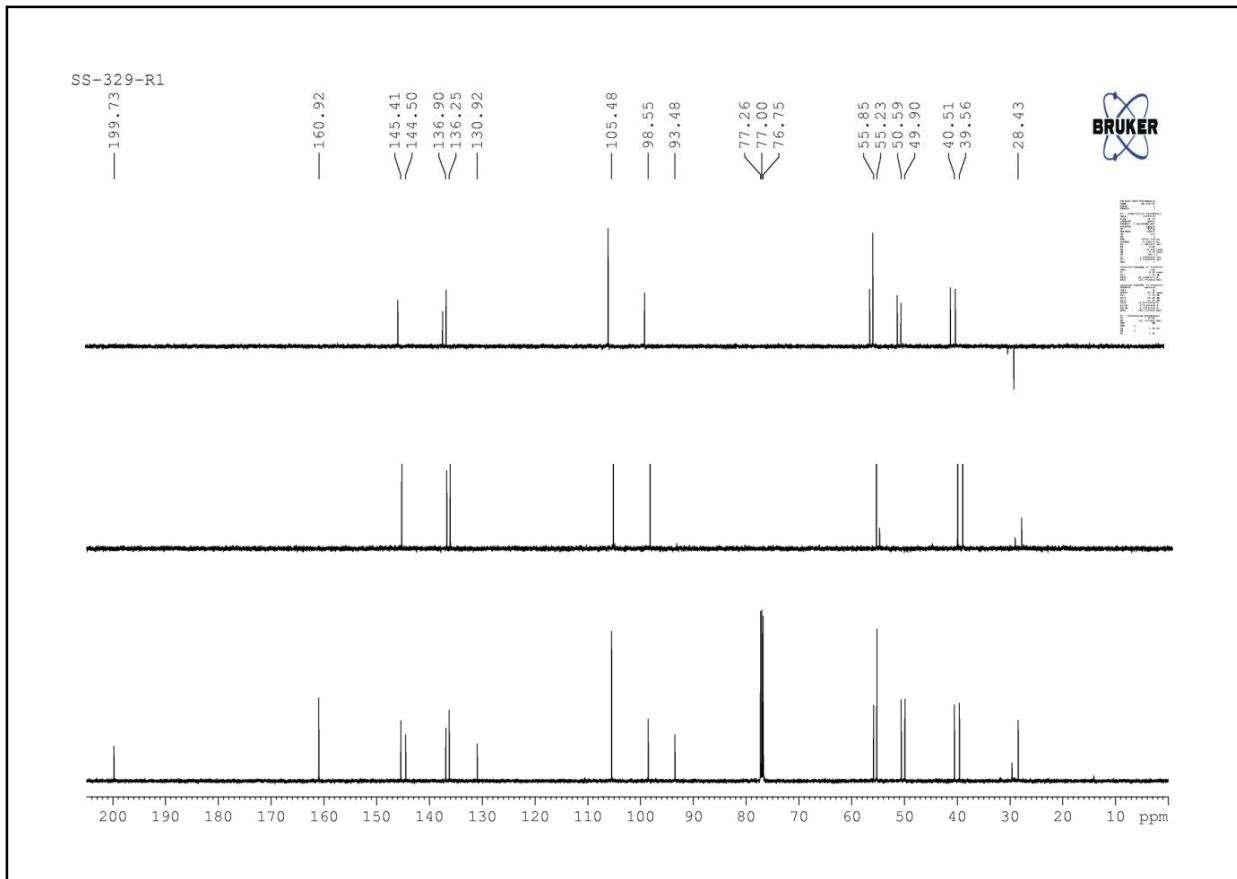

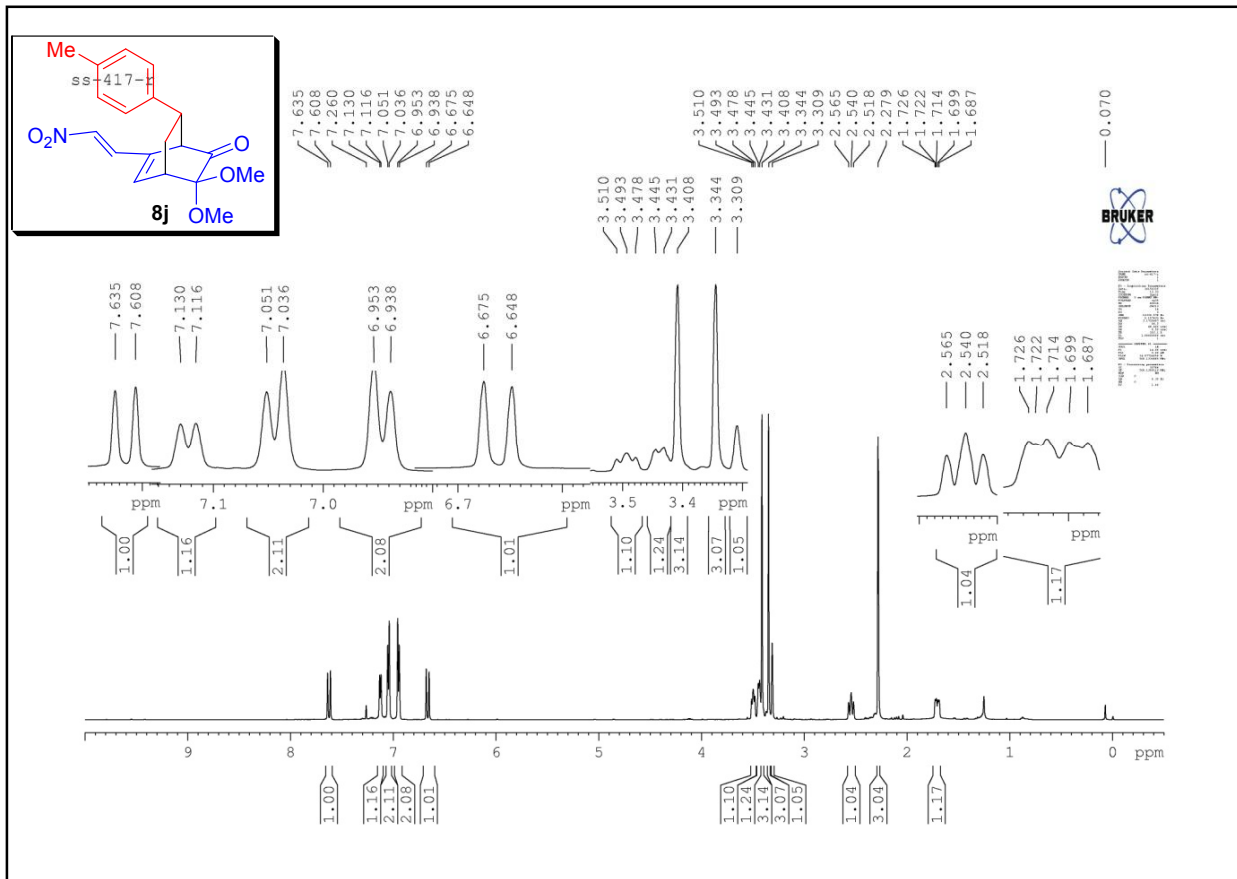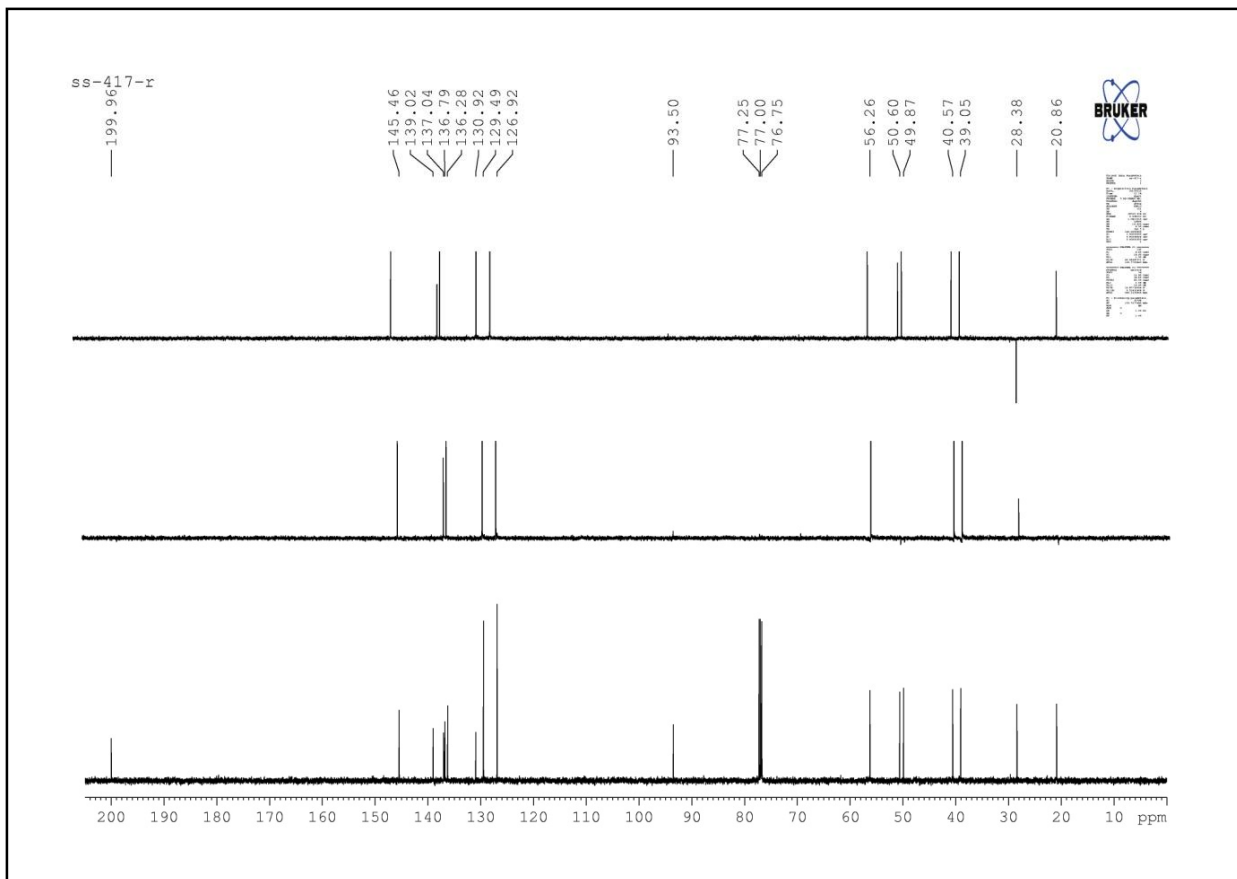

SS-346

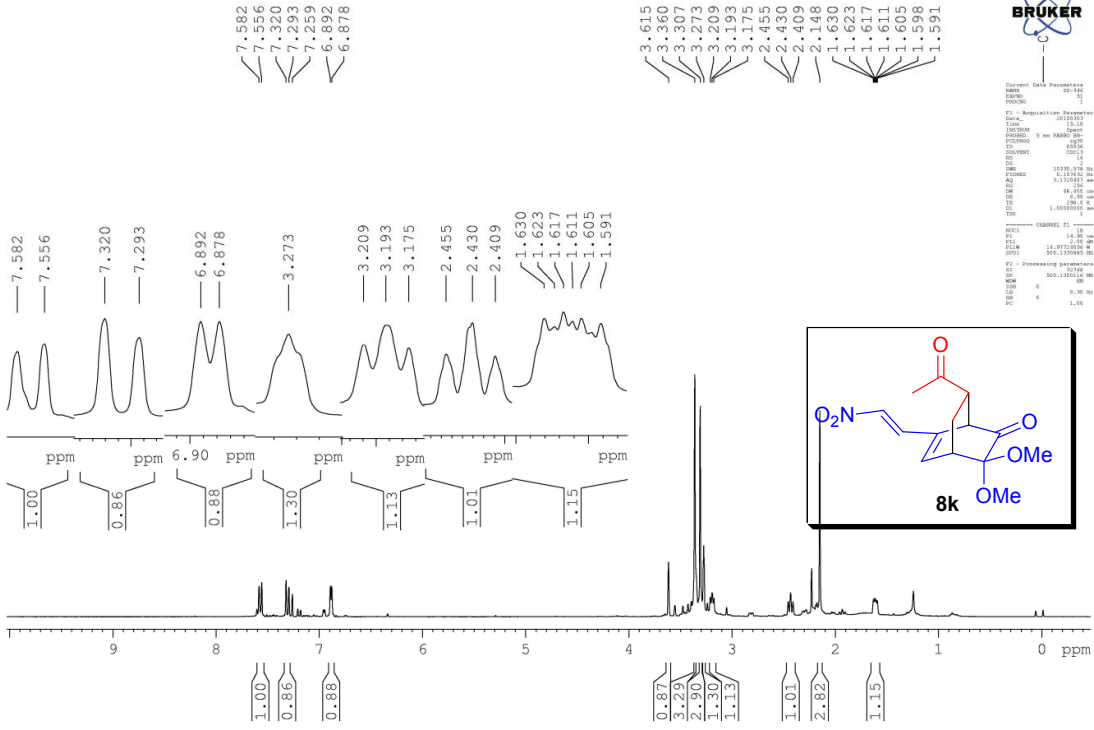

SS-346

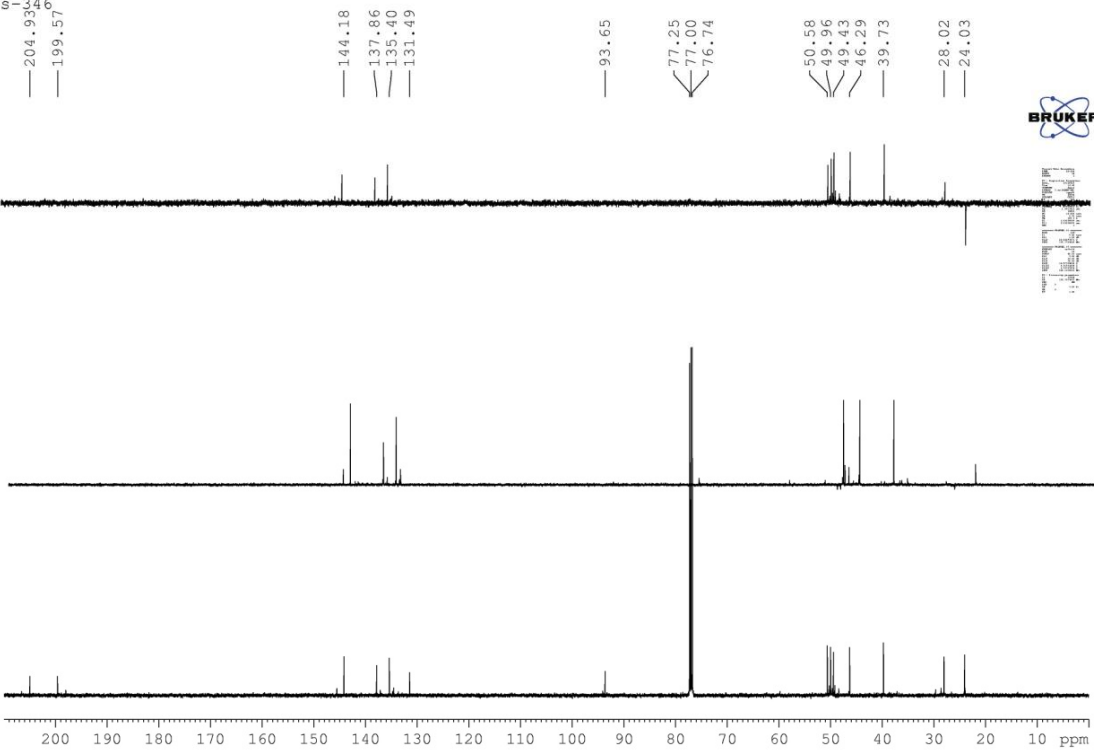





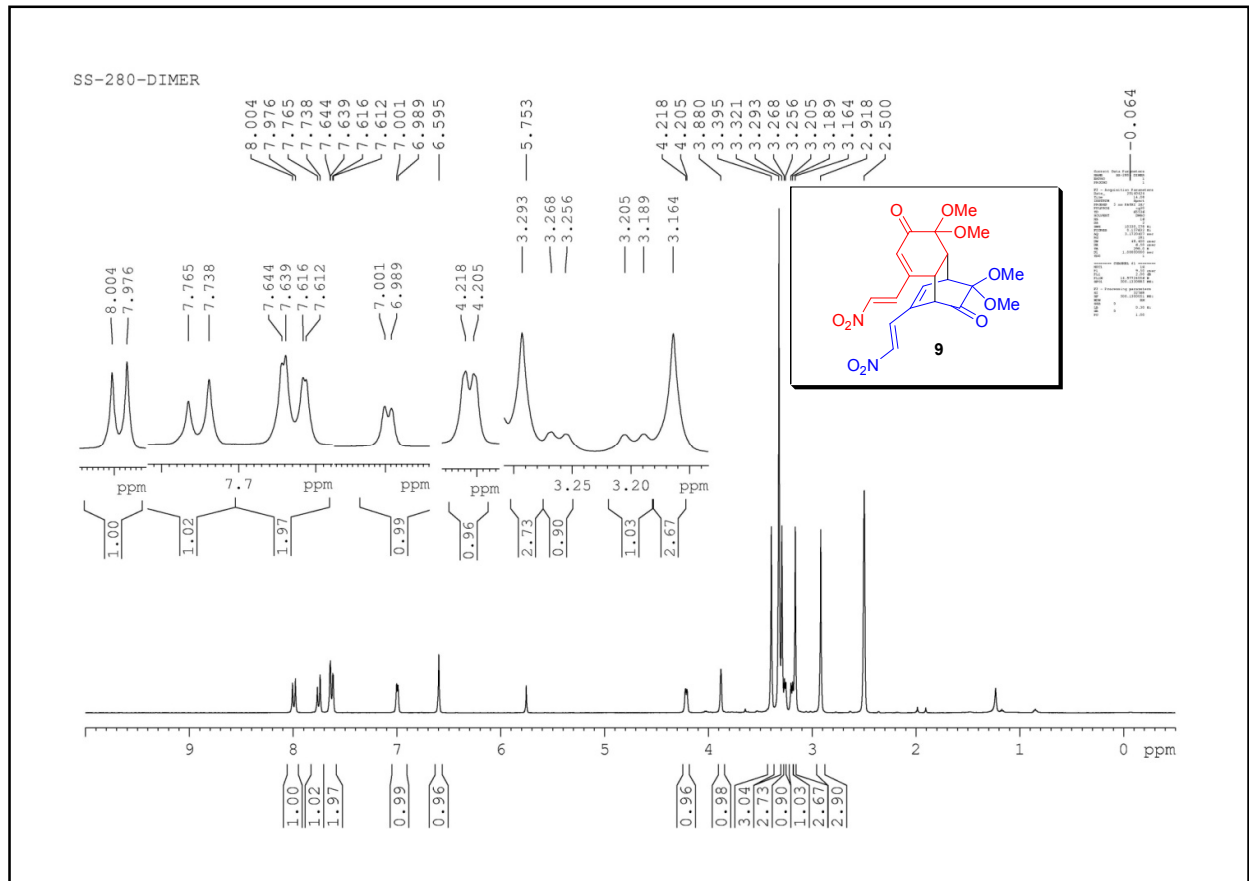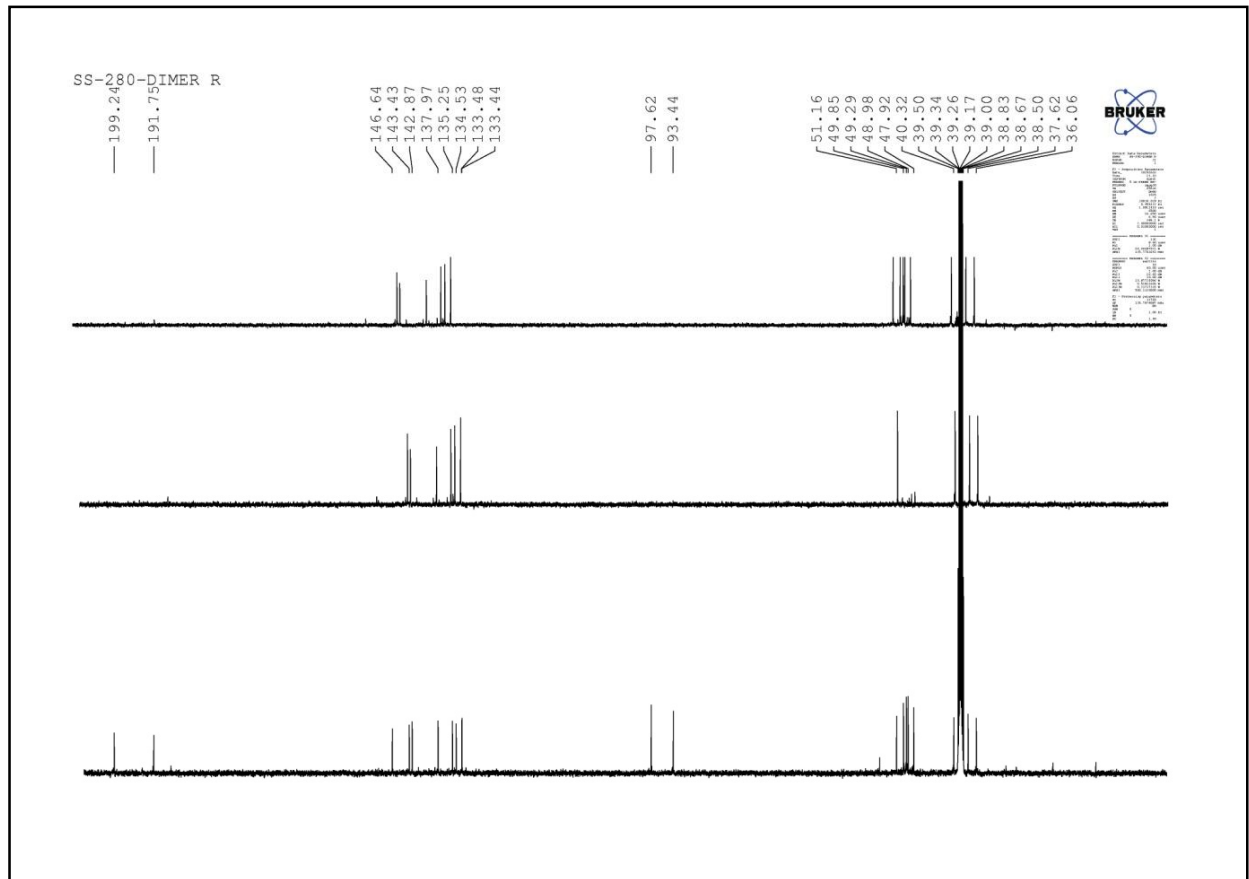







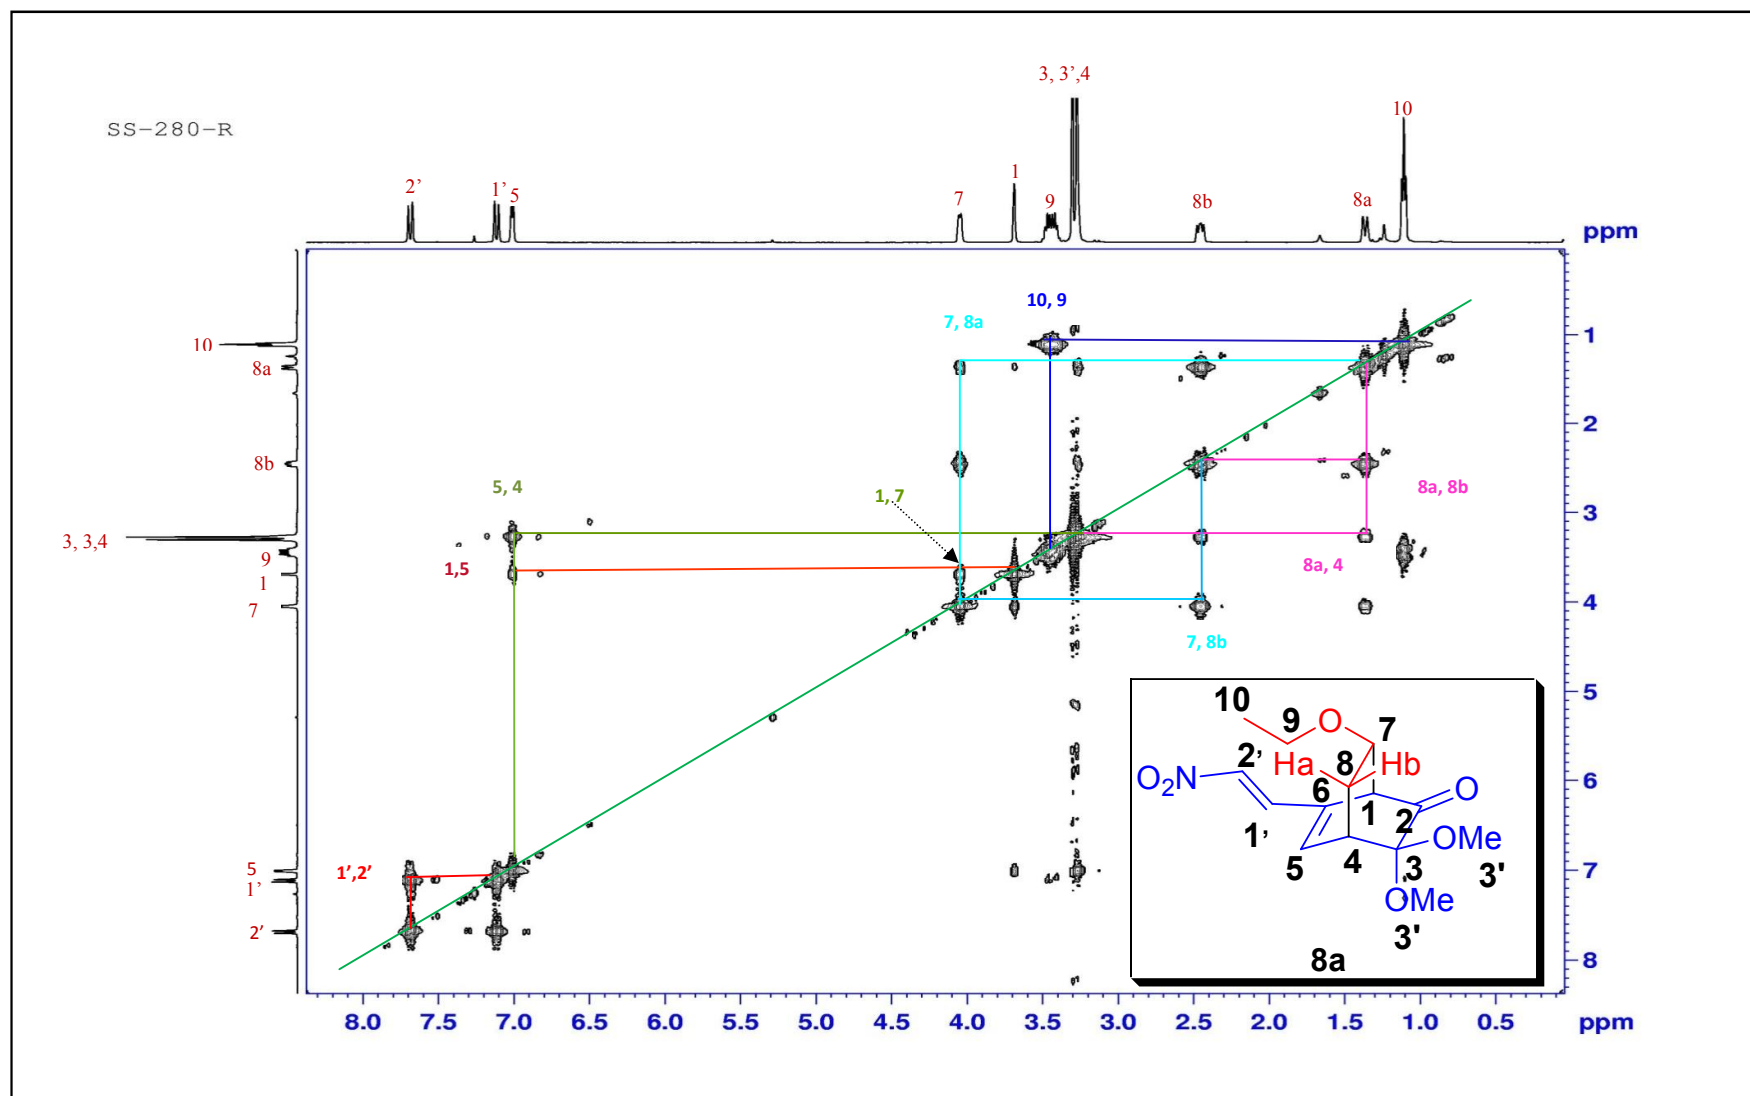

$^1\text{H}$ - $^1\text{H}$  Cosy Spectrum of cycloadduct **8a**

SS-280-R

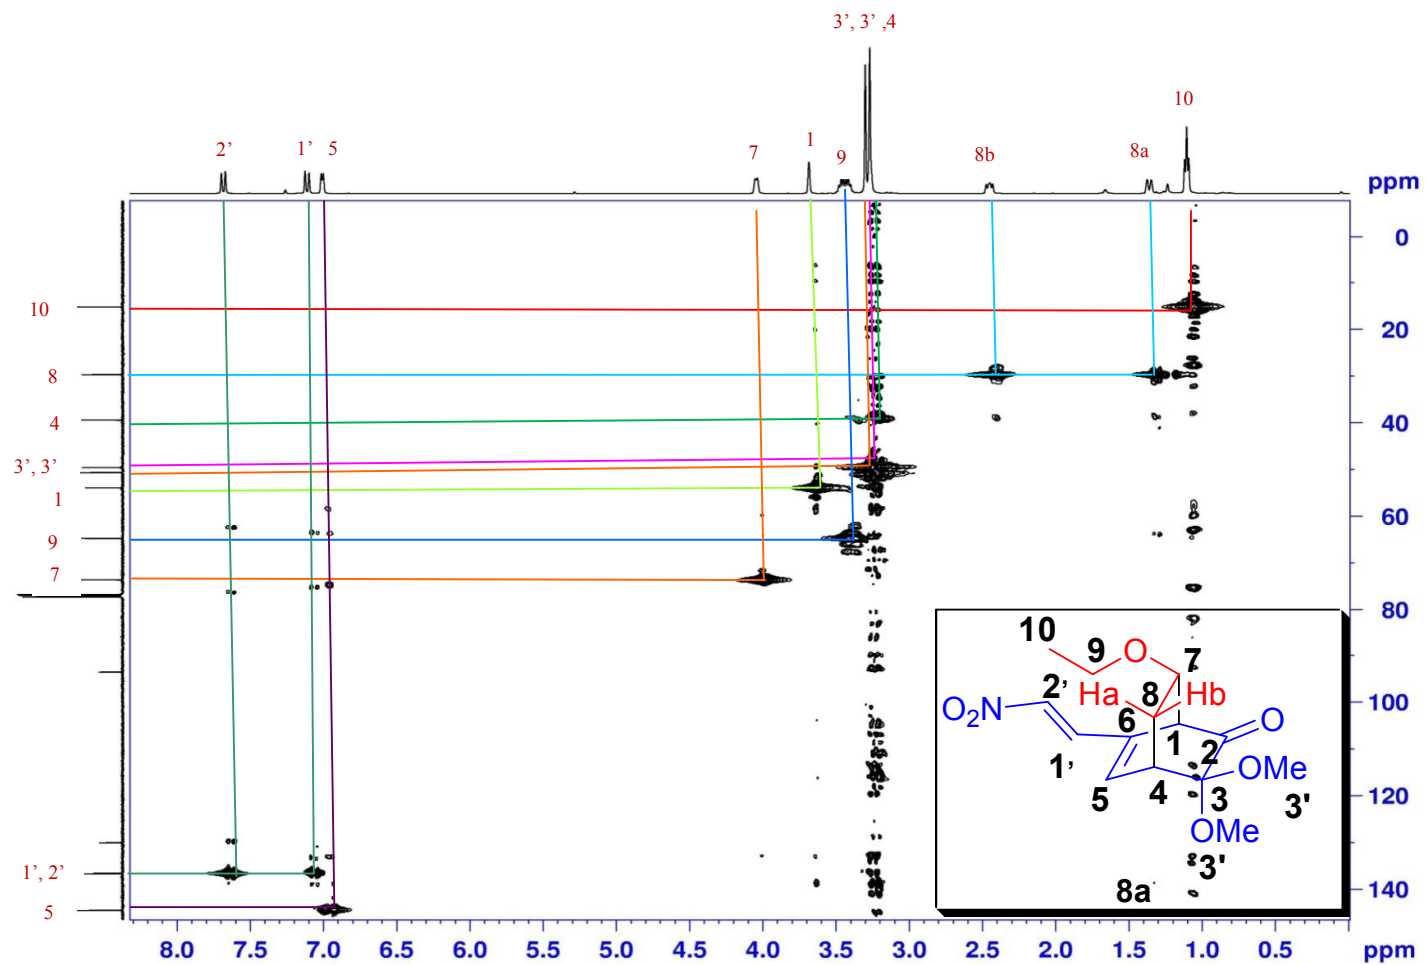

HMQC Spectrum of cycloadduct **8a**

**Table SI-1:** Proton–proton and proton–carbon connectivity in **8a**.

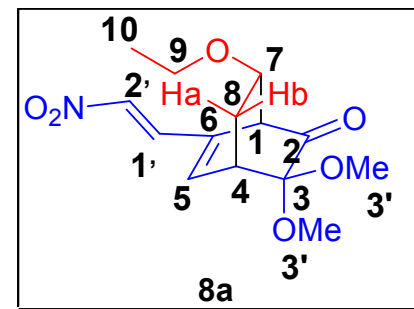

| $^1\text{H}$ - $^1\text{H}$ COSY                                                                      | $^{13}\text{C}$ Signals          | $\delta$ (ppm) | Connectivity from HMQC                                           |
|-------------------------------------------------------------------------------------------------------|----------------------------------|----------------|------------------------------------------------------------------|
| $\text{H}_1$ – $\text{H}_5$<br>$\text{H}_1$ – $\text{H}_7$                                            | $\text{C}_1$                     | 53.9           | $\text{H}_1$ – $\text{C}_1$                                      |
| –                                                                                                     | $\text{C}_{3'}$ ( $\text{OMe}$ ) | 49.6, 50.7     | $\text{H}_{3'}$ – $\text{C}_{3'}$                                |
| $\text{H}_4$ – $\text{H}_5$<br>$\text{H}_4$ – $\text{H}_{8a}$                                         | $\text{C}_4$                     | 39.4           | $\text{H}_4$ – $\text{C}_4$                                      |
| $\text{H}_5$ – $\text{H}_1$                                                                           | $\text{C}_5$                     | 144.4          | $\text{H}_5$ – $\text{C}_5$                                      |
| $\text{H}_7$ – $\text{H}_1$                                                                           | $\text{C}_7$                     | 73.60          | $\text{H}_7$ – $\text{C}_7$                                      |
| $\text{H}_{8a}$ – $\text{H}_{8b}$<br>$\text{H}_{8a}$ – $\text{H}_4$<br>$\text{H}_{8a}$ – $\text{H}_7$ | $\text{C}_8$                     | 29.7           | $\text{H}_{8a}$ – $\text{C}_8$<br>$\text{H}_{8b}$ – $\text{C}_8$ |
| $\text{H}_9$ – $\text{H}_{10}$                                                                        | $\text{C}_9$                     | 64.7           | $\text{H}_9$ – $\text{C}_9$                                      |
| $\text{H}_{10}$ – $\text{H}_9$                                                                        | $\text{C}_{10}$                  | 15.2           | $\text{H}_{10}$ – $\text{C}_{10}$                                |
|                                                                                                       |                                  |                |                                                                  |
| $\text{H}_{1'}$ – $\text{H}_{2'}$                                                                     | $\text{C}_{1'}$                  | 136.5          | $\text{H}_{1'}$ – $\text{C}_{1'}$                                |
|                                                                                                       | $\text{C}_{2'}$                  | 136.6          | $\text{H}_{2'}$ – $\text{C}_{2'}$                                |

**Table SI-2:** Selected  $^1\text{H}$  Chemical shifts (in ppm ) of Diels-Alder adducts.

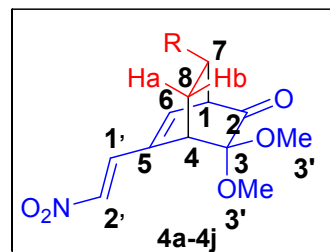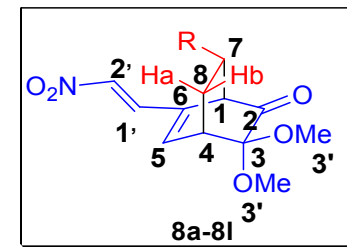

| S.No. | Adduct    | H-1       | H-4       | H-6 (4a-4j)/<br>H-5 (8a-8l) | H-7       | H-8a      | H-8b      | H-1' | H-2' |
|-------|-----------|-----------|-----------|-----------------------------|-----------|-----------|-----------|------|------|
| 1     | <b>4a</b> | 3.77      | 3.23      | 6.62                        | 4.06-4.03 | 1.36      | 2.48      | 7.26 | 7.68 |
| 2     | <b>4b</b> | 3.79      | 3.25-3.23 | 6.62                        | 4.05-4.03 | 1.50-1.47 | 2.50      | 7.27 | 7.70 |
| 3     | <b>4c</b> | 3.79      | 3.34      | 6.67                        | 4.39      | -         | 3.00      | 7.20 | 7.75 |
| 4     | <b>4d</b> | 3.42-3.40 | 3.49      | 6.71                        | 3.53      | 1.65      | 2.63      | 7.35 | 7.75 |
| 5     | <b>4e</b> | 3.45-3.43 | 3.39-3.37 | 6.68                        | 3.50-3.45 | 1.60-1.56 | 2.64-2.56 | 7.33 | 7.73 |
| 6     | <b>4f</b> | 3.50-3.45 | 3.39      | 6.69                        | 3.50-3.45 | 1.65-1.57 | 2.65-2.55 | 7.34 | 7.73 |
| 7     | <b>4g</b> | 3.49-3.45 | 3.39      | 6.71                        | 3.49-3.45 | 1.65-1.58 | 2.64-2.57 | 7.34 | 7.73 |
| 8     | <b>4h</b> | 3.47      | 3.36      | -                           | 3.98      | 1.52      | 2.62-2.53 | 7.31 | 7.70 |
| 9     | <b>4i</b> | 3.42      | 3.37      | 6.71                        | 3.48      | 1.64-1.56 | 2.64-2.55 | 7.32 | 7.72 |
| 10    | <b>4j</b> | 3.52-3.44 | 3.39      | 6.69                        | 3.52-3.44 | 1.62      | 2.63-2.57 | 7.35 | 7.74 |
| 11    | <b>8a</b> | 3.68      | 3.28      | 7.01                        | 4.06-4.02 | 1.37      | 2.46      | 7.11 | 7.69 |
| 12    | <b>8b</b> | 3.67      | 3.25      | 6.98                        | 4.01-3.97 | 1.34-1.30 | 2.44-2.38 | 7.09 | 7.65 |
| 13    | <b>8c</b> | 3.70      | 3.56-3.50 | 6.85                        | 4.42      | -         | 3.40      | 7.16 | 7.66 |
| 14    | <b>8d</b> | 3.46-3.43 | 3.33      | 7.12                        | 3.55-3.50 | 1.73      | 2.56      | 6.63 | 7.61 |
| 15    | <b>8e</b> | 3.44-3.41 | 3.29      | 7.12                        | 3.48      | 1.67      | 2.56-2.49 | 6.67 | 7.61 |
| 16    | <b>8f</b> | 3.49-3.43 | 3.33      | 7.13                        | 3.49-3.43 | 1.67      | 2.56      | -    | 7.65 |
| 17    | <b>8g</b> | 3.46-3.42 | 3.35      | 7.14                        | 3.46-3.42 | 1.66-1.59 | 2.59-2.52 | 6.80 | 7.66 |
| 18    | <b>8h</b> | 3.41      | 3.37      | 7.14                        | 4.07-4.02 | 1.70-1.65 | 2.48-2.42 | -    | 7.57 |
| 19    | <b>8i</b> | 3.46-3.39 | 3.34      | 7.10                        | 3.46-3.39 | 1.68      | 2.53      | 6.76 | 7.64 |
| 20    | <b>8j</b> | 3.45-3.42 | 3.31      | 7.12                        | 3.52-3.46 | 1.73-1.67 | 2.52-2.50 | 6.95 | 7.62 |



|    |           |           |           |      |           |           |           |      |      |
|----|-----------|-----------|-----------|------|-----------|-----------|-----------|------|------|
| 21 | <b>8k</b> | 3.27      | 3.21-3.16 | 6.89 | 3.62      | 1.64-1.58 | 2.46-2.41 | 7.31 | 7.57 |
| 22 | <b>8l</b> | 3.74-3.67 | 3.18-3.13 | 6.96 | 3.74-3.67 | 1.86-1.80 | 2.39-2.32 | 7.22 | 7.59 |

**Table SI-3:** Selected  $^{13}\text{C}$  Chemical shifts (in ppm ) of Diels-Alder adducts.

| S.No. | Adduct    | C-1  | C-2   | C-3  | C-4  | C-5   | C-6   | C-7  | C-8  | C-1'  | C-2'  |
|-------|-----------|------|-------|------|------|-------|-------|------|------|-------|-------|
| 1     | <b>4a</b> | 55.4 | 199.2 | 93.1 | 38.5 | 138.6 | 136.9 | 74.8 | 29.6 | 135.9 | 135.9 |
| 2     | <b>4b</b> | 55.5 | 199.3 | 93.3 | 38.7 | 138.7 | 137.0 | 69.0 | 29.7 | 136.0 | 137.0 |
| 3     | <b>4c</b> | 56.4 | 198.8 | 92.8 | 37.7 | 137.6 | 137.2 | 78.9 | 30.0 | 136.7 | 137.0 |
| 4     | <b>4d</b> | 56.8 | 199.4 | 93.3 | 39.9 | 139.7 | 137.1 | 40.8 | 29.3 | 135.7 | 136.9 |
| 5     | <b>4e</b> | 55.2 | 199.5 | 93.3 | 39.9 | 139.7 | 137.1 | 40.2 | 29.3 | 134.8 | 135.7 |
| 6     | <b>4f</b> | 57.3 | 199.5 | 93.4 | 40.0 | 139.8 | 137.3 | 40.6 | 29.4 | 135.7 | 137.1 |
| 7     | <b>4g</b> | 56.2 | 199.3 | 93.3 | 40.0 | 139.9 | 136.8 | 41.2 | 29.5 | 135.4 | 137.4 |
| 8     | <b>4h</b> | 55.2 | 199.6 | 93.5 | 33.4 | 139.5 | 137.6 | 39.9 | 27.8 | 137.1 | 137.6 |
| 9     | <b>4i</b> | 56.7 | 199.3 | 93.3 | 40.0 | 139.7 | 137.2 | 41.0 | 29.3 | -     | -     |
| 10    | <b>4j</b> | 57.1 | 199.5 | 93.4 | 40.1 | 139.8 | 137.1 | 40.6 | 29.4 | 137.1 | 137.1 |
| 11    | <b>8a</b> | 53.9 | 199.7 | 93.5 | 39.4 | 144.4 | 130.0 | 73.6 | 29.7 | 136.5 | 136.6 |
| 12    | <b>8b</b> | 53.9 | 199.8 | 93.6 | 39.4 | 144.5 | 130.1 | 73.8 | 29.6 | 136.6 | 136.6 |
| 13    | <b>8c</b> | 55.1 | 199.5 | 93.3 | 38.5 | 142.8 | 131.9 | 78.4 | 43.9 | 136.1 | 137.4 |
| 14    | <b>8d</b> | 56.1 | 199.8 | 93.5 | 39.4 | 145.4 | 130.0 | 40.6 | 28.2 | 136.2 | 136.7 |

|    |           |      |       |      |      |       |       |      |      |       |       |
|----|-----------|------|-------|------|------|-------|-------|------|------|-------|-------|
| 15 | <b>8e</b> | 56.4 | 200.0 | 93.5 | 38.7 | 145.5 | 130.9 | 40.5 | 28.5 | 136.3 | 136.7 |
| 16 | <b>8f</b> | 55.9 | 199.9 | 93.5 | 39.2 | 145.6 | 131.1 | 40.6 | 28.9 | 136.3 | 137.0 |
| 17 | <b>8g</b> | 55.8 | 199.5 | 93.4 | 39.6 | 145.6 | 131.0 | 40.5 | 29.1 | 137.0 | 137.2 |
| 18 | <b>8h</b> | 54.1 | 200.3 | 93.8 | 31.6 | 145.2 | 131.4 | 40.6 | 26.5 | 136.5 | 136.6 |
| 19 | <b>8i</b> | 55.9 | 199.7 | 93.5 | 39.6 | 145.4 | 130.9 | 40.5 | 28.4 | 136.3 | 136.9 |
| 20 | <b>8j</b> | 56.3 | 200.0 | 93.5 | 39.1 | 144.5 | 130.9 | 40.6 | 20.9 | 136.3 | 136.8 |
| 21 | <b>8k</b> | 50.0 | 199.6 | 93.7 | 39.7 | 144.2 | 131.5 | 46.3 | 24.0 | 135.4 | 137.9 |
| 22 | <b>8l</b> | 50.1 | 199.3 | 93.6 | 38.7 | 145.4 | 131.1 | 39.7 | 24.1 | 135.4 | 137.5 |
